# Supplementary material for: Methadone maintenance treatment programme reduces criminal activity and improves social well-being of drug users in China: a systematic review and meta-analysis
Source: PubMed Central journal article supplement — BMJ Open. 2015 Jan 8;5(1):e005997. doi: 10.1136/bmjopen-2014-005997 (PMC4289728; doi:10.1136/bmjopen-2014-005997), 2015-01-08
Supplement: bmjopen-2014-005997.draft_revisions.pdf [file bmjopen-2014-005997.draft_revisions.pdf]

# BMJ Open

## Improvements in social functioning and family relations among clients in methadone maintenance treatment clinics in China: a systematic review and meta-analysis

|                                 |                                                                                                                                                                                                                                                                                                                                                                                                                                                                                          |
|---------------------------------|------------------------------------------------------------------------------------------------------------------------------------------------------------------------------------------------------------------------------------------------------------------------------------------------------------------------------------------------------------------------------------------------------------------------------------------------------------------------------------------|
| Journal:                        | <i>BMJ Open</i>                                                                                                                                                                                                                                                                                                                                                                                                                                                                          |
| Manuscript ID:                  | bmjopen-2014-005997                                                                                                                                                                                                                                                                                                                                                                                                                                                                      |
| Article Type:                   | Research                                                                                                                                                                                                                                                                                                                                                                                                                                                                                 |
| Date Submitted by the Author:   | 07-Jul-2014                                                                                                                                                                                                                                                                                                                                                                                                                                                                              |
| Complete List of Authors:       | Sun, Huamin; Nantong University, School of Public Health<br>Li, XiaoYan; Nantong University, School of Public Health<br>Chow, Eric; The Kirby Institute, University of New South Wales; Melbourne Sexual Health Centre, Alfred Health<br>Lu, YiHua; Nantong University, School of Public Health<br>Tian, Tian; Nantong University, School of Public Health<br>Zhang, Lei; The Kirby Institute, University of New South Wales<br>Zhuang, Xun; Nantong University, School of Public Health |
| <b>Primary Subject Heading</b>: | Public health                                                                                                                                                                                                                                                                                                                                                                                                                                                                            |
| Secondary Subject Heading:      | Epidemiology, Public health                                                                                                                                                                                                                                                                                                                                                                                                                                                              |
| Keywords:                       | PUBLIC HEALTH, Epidemiology < INFECTIOUS DISEASES, HIV & AIDS < INFECTIOUS DISEASES                                                                                                                                                                                                                                                                                                                                                                                                      |
|                                 |                                                                                                                                                                                                                                                                                                                                                                                                                                                                                          |

SCHOLARONE™  
Manuscripts

Only

1  
2  
3 **Improvements in social functioning and family relations among clients in**  
4 **methadone maintenance treatment clinics in China: a systematic review and**  
5 **meta-analysis**  
6  
7  
8

9 Hua-Min Sun<sup>1</sup>

10 Email: huamin2380@163.com

11 Xiao-Yan Li<sup>1</sup>

12 Email: sqzr357@126.com

13 Eric PF Chow<sup>2,3,4</sup>

14 Email: echow@mshc.org.au

15 Yi-Hua Lu<sup>1</sup>

16 Email: 23291828@qq.com

17 Tian Tian<sup>1</sup>

18 Email: ttyes\_01@163.com

19 Lei Zhang<sup>2</sup>

20 Email: lzhang@kirby.unsw.edu.au

21 Xun Zhuang<sup>1</sup>

22 Email: ntzhuang@163.com

23 **Word count:** 2464

24  
25  
26  
27  
28  
29  
30  
31  
32  
33  
34  
35  
36  
37  
38  
39  
40  
41  
42  
43  
44  
45  
46  
47  
48  
49  
50  
51  
52  
53  
54  
55  
56  
57  
58  
59  
60

---

HMS and XYL are joint first authors.

<sup>1</sup> Department of Epidemiology and Biostatistics, School of Public Health, Nantong University, Jiangsu  
226019, China

<sup>2</sup> The Kirby Institute, University of New South Wales, Sydney, NSW, Australia

<sup>3</sup> Melbourne Sexual Health Centre, Alfred Health, Melbourne, Victoria, Australia

<sup>4</sup> Central Clinical School, Faculty of Medicine, Nursing and Health Sciences, Monash University,  
Melbourne, Victoria, Australia

LZ and XZ are joint corresponding authors.

Correspondence: The Kirby Institute, University of New South Wales, Sydney, NSW, Australia. Phone:  
+612 9385 0869 Fax: +612 9385 0920. Department of Epidemiology and Biostatistics, School of  
Public Health, Nantong University. Nantong 226019, Jiangsu, China. Phone(Fax): +86-513-85012902.

## ABSTRACT

**Objective:** Methadone maintenance treatment (MMT) has been implemented in China since 2004. It was initiated in eight pilot clinics and subsequently expanded into a nationwide program. The study aims to evaluate the changes in social functioning and family relations among drug addicts in (MMT) clinics in China through a systematic review and meta-analysis.

**Methods:** Chinese and English databases of literature were searched thoroughly for studies reporting the changes in social functioning and family relations among MMT clients from 2004 to 2011.

**Results:** Twenty-six articles were eligible in this review (1 in English and 25 in Chinese). The self-reported arrest rate reduced from 13.7% (95% CI: 9.1-20.0%) at baseline, to 3.5% (95% CI: 1.1-10.5%), and to 4.3% (95% CI: 1.6-11.4%) after 6, and 12-month MMT intervention, respectively. The rate for drug-selling reduced from 7.6% (95% CI: 3.8-14.8%) at baseline, to 1.9% (95% CI: 0.6-6.2%), and to 3.0% (95% CI: 1.0-8.9%) after 6, and 12-month of intervention, respectively. In addition, the employment rate of clients increased dramatically from 26.4% (95% CI: 22.9-30.1%) at baseline, to 41.6% (95% CI: 36.6-48.0%) at 6-month, and further increased to 59.8% (95% CI: 52.4-66.8%) at 12-month intervention. The proportion of clients having a good relationship with family also increased from 37.9% (95% CI: 32.0-44.2%) at baseline, to 59.6% (95% CI: 48.1-70.2%) at 6-month, to 75.0% (95% CI: 69.0-80.2%) at 12-month intervention, respectively. In addition, 31.0% (95% CI: 25.7-36.8%) of clients contacted with former drug-user friends daily, but this rate reduced 7.7% (95% CI: 1.4-33.2%), and to 1.0% (95% CI: 0.1-6.6%) after 6, and 12-month of intervention.

**Conclusions:** MMT has significant reduced the criminal activities and improved employment rate and the family relationship among the clients. MMT is an effective measure in reducing addiction-related crimes and help to resume societal and familial functions for drug users in China.

## KEY WORDS

Criminal activities, Social functioning and family relations, Changes, Methadone maintenance treatment, Meta-analysis, China

## Strengths and limitations of this study

This is the first study to review how MMT intervention could influence the changes of social functioning and family relations among drug users in MMT clinics in China.

1  
2  
3  
4  
5  
6  
7  
8  
9  
10  
11  
12  
13  
14  
15  
16  
17  
18  
19  
20  
21  
22  
23  
24  
25  
26  
27  
28  
29  
30  
31  
32  
33  
34  
35  
36  
37  
38  
39  
40  
41  
42  
43  
44  
45  
46  
47  
48  
49  
50  
51  
52  
53  
54  
55  
56  
57  
58  
59  
60

This study evaluated the changes in drug-related criminal behaviours, improvements in social functioning and family relations among drug users before and after entering the MMT interventions through a meta-analysis of published literature since 2004 in China.

The number of available reports was small which could be a limitation of the study.

For peer review only

## INTRODUCTION

Illicit drug abuse has become a social problem and public health issue internationally since the last decade, it not only increases the risks of disease transmission such as HIV and hepatitis C virus (HCV),<sup>1 2</sup> but also enhances the problems in drug-related criminal activities, family problems, and excessive health care expenditures.<sup>3 4</sup> Heroin is the most common drug used among drug users in both developed and developing countries.<sup>5-7</sup> Methadone maintenance treatment (MMT) has been found to be an effective harm reduction program for drug users since 1949,<sup>8-10</sup> and it has been rapidly scaled up around the world. Methadone is a relatively safe, low-cost and convenient generic drug, it is also used in the treatment of opioid dependence<sup>11 12</sup> for solving medical and clinical issues such as reducing the death rates, improving the clients' health and so on,<sup>13-15</sup> reducing addiction-related crimes and helping to resume social and familial functions in drug users.<sup>16-25</sup>

In 2004, eight out-patient MMT clinics were established in China<sup>26 27</sup> and lately expanded into a nationwide program encompassing more than 696 clinics covering 27 provinces by 2010.<sup>28</sup> It is shown that the implementation of these eight MMT clinics has significantly improved the social functioning among MMT clients, for example, the annual employment rate increased from 22.9% to 40.6%; and the proportion of clients having a harmonious relationship with families increased from 49.6% to 65.8% after receiving the MMT programs for 12 months. Additionally, the self-reported criminal behaviour of clients has also reduced from 20.7% to 3.8%.<sup>24</sup> Tens of thousands of drug users and their families are benefited from the positive outcomes with participating in the MMT in China.<sup>24 29</sup> The effectiveness of MMT was also observed in other countries. For instance, the employment rate of the participants in Malaysia increased from 70.1% to 77.6% after two years of treatment.<sup>30</sup> A retrospective study in UK showed that the total convictions and cautions per year, theft and fraud convictions and cautions per year, weeks spent in prison per year were reduced by 39.3% (95% CI: 0.05-0.98), 82.17% (95% CI: 0.11-0.89), 82% (95% CI: 0.66-3.47), respectively.<sup>31</sup>

Improvements among MMT clients have been reported across China,<sup>32-38</sup> for example, the self-reported arrest rate decreased from 3.2-44.4% to 1.0-2.6%,<sup>32 34 36</sup> employment rate increased from 22.61-28.3% to 55.1-90.9%<sup>39-41</sup> and family relationship improved from 40.2-59.8% to 78.8-82.4%.<sup>32 42</sup> This study aims to evaluate the changes in drug-related criminal behaviours, improvements in social functioning and family relations among drug users before and after entering the MMT interventions through a meta-analysis of published literature since 2004 in China.

## METHODS

### Data sources

Two independent investigators (HMS, XYL) conducted a systematic review of published peer-reviewed research articles by searching the following databases: PubMed, Chongqing VIP Chinese Science and Technology Journals Database (CQVIP), China National Knowledge Infrastructure (CNKI) and Wanfang Data from January 2004 to December 2011. Keywords used in the database search included (“Methadone” OR “Methadone Maintenance Treatment” OR “Methadone Maintenance Therapy” OR “Methadone Maintenance” OR “MMT”) AND (“Crime” OR “Criminal rates” OR “Employment” OR “Family relationship” OR “Social functions”) AND (“China” OR “China Mainland” OR “Chinese”). We also performed a manual search on the reference lists of published articles. This review was reported according to the PRISMA (Preferred Reporting Items for Systematic Reviews and Meta-Analyses) Statement issued in 2009.<sup>43</sup>

### Study selection

Studies were eligible for inclusion in this systematic review if they met the following criteria: (1) articles published in Chinese or English language; (2) study reported social functioning or family relations among clients in MMT at baseline and follow-up; and (3) reported the study design such as study location, investigation period, duration of intervention, and sample size. Pre-and-post intervention studies among MMT clients were also included. Exclusion criteria were: (1) review papers; (2) non peer-reviewed local/government reports; (3) conference abstracts and presentations; and (4) dissertations. If the same data source were published in both English and Chinese sources, the articles published in Chinese language were excluded from this study.

### Qualitative assessment

The quality of studies was assessed using a validated quality assessment tool for observational studies.

<sup>44</sup> The following eight items were assessed to calculate a total quality score: (1) clear definition of the target population; (2) representativeness of probability sampling; (3) sample characteristics matching the overall population; (4) adequate response rate; (5) method of data collection methods; (6) reliability of survey measures/instruments; (7) validity of survey measures/instruments; and (8) appropriate statistical methods. Each item was scored 0 for ‘No’ and 1 for ‘Yes’, respectively. The total quality score ranged from 0 to 8 (Table S1).

### Data abstraction

We extracted the following information from all eligible studies: first author, year of publication, study location, investigation period, gender composition, age, sample size, duration of intervention, proportion of drug-related criminal activities, employment rate, and relationship with family among clients in MMT at baseline and follow-up of treatment. Due to limited studies available, meta-analysis was not performed to investigate the contribution of MMT to the changes of clients involved in drug-related crime and selling sex for drugs. And the result was given with the range.

### Statistical Analysis

Meta-analyses were carried out with the Comprehensive Meta-Analysis software (V2.0, Biostat, Englewood, New Jersey). The effect rates of pooled estimates and 95% confidence intervals (CIs) were determined based on random effect models. Heterogeneity tests were performed using the Cochran Q-test ( $P < 0.10$  represents statistically significant heterogeneity) and  $I^2$  statistic. Potential publication bias was measured by the Begg and Mazumdar rank correlation ( $P < 0.05$  represents statistically significant publication bias).

## RESULTS

### Trial Flow/Flow of included studies

According to our initial search strategies, 226 articles were identified from four electronic databases (11 in PubMed, 116 in CNKI, 10 in CQVIP, 86 in Wanfang database and 3 in other sources). We excluded 86 irrelevant articles after the title screening. The remaining 140 abstracts were screened, and 83 articles were excluded (41 were irrelevant to the topic, 41 were non peer-reviewed articles, and 1 study was not conducted in China). 57 articles were eligible for full-text screening, of these, 31 articles were excluded (12 were not original studies, 6 did not report the outcome variables, 6 did not report follow-up period, 3 studies were duplicated from same data sources, 2 were not conducted in MMT clinics, and 1 study covered multiple provinces). A total of 26 articles were eligible and included (1 in English, 25 in Chinese) in this review. 11 studies reported the changes in criminal behaviours associated with illegal drug uses (11 reported arrest rate, 6 reported drug-sold), and 26 studies reported the changes in family and friends relations (23 reported employment, 18 reported relationship with family, 8 reported relationship with friends). The selection process is illustrated in Figure 1.

### Study characteristics

1  
2  
3 The sample size of MMT clients reported in the eligible studies ranged from 65 to 13310 (median: 233,  
4 IQR:115-554). A total of 22854 participants were included in this review, and about 83.7% were male.  
5  
6 The mean age of the total MMT clients was 34.6 years (range: 18-62 years). Of the 26 eligible articles,  
7 almost half of the studies (42.3%) were conducted in the provinces with high HIV prevalence (>20%)<sup>45</sup>  
8  
9  
10  
11  
12  
13  
14  
15  
16  
17  
18  
19  
20  
21  
22  
23  
24  
25  
26  
27  
28  
29  
30  
31  
32  
33  
34  
35  
36  
37  
38  
39  
40  
41  
42  
43  
44  
45  
46  
47  
48  
49  
50  
51  
52  
53  
54  
55  
56  
57  
58  
59  
60

The mean age of the total MMT clients was 34.6 years (range: 18-62 years). Of the 26 eligible articles, almost half of the studies (42.3%) were conducted in the provinces with high HIV prevalence (>20%)<sup>45</sup> including Yunnan, Sichuan, Guangzhou, Xinjiang, Guizhou and Guangxi. The follow-up period of MMT intervention ranged from 6 to 36 months, and the majority were followed up within 12 months (84.6%). Half of the studies (n=13) were prospective cohort studies, and others were retrospective studies.

### **The criminal activities**

The criminal activities among the MMT clients had significantly reduced after receiving MMT intervention. The self-reported arrest rate reduced from 13.7% (95% CI: 9.1-20.0%) at baseline (Table 1, Figure 2), to 3.5% (95% CI: 1.1-10.5%), to 4.3% (95% CI: 1.6-11.4%) and to 1.4% (95% CI: 0.5-3.7%) at 6-, 12- and 36-months follow-up. About 7.6% (95% CI: 3.8-14.8%) of the clients who had sold drugs before receiving MMT intervention (Table 1, Figure 3), this rate was reduced to 1.9% (95% CI: 0.6-6.2%) after 6 months, to 3.0% (95% CI: 1.0-8.9%) after 12 months and 1.0% (95% CI: 0.1-6.6%) after 36 months. 10 studies reported the rate of drug-related crime decreased from 1.1-30.34% to 0.5-3.7%.<sup>24</sup>  
<sup>32 34 39 42 47-51</sup> In addition, 6 studies reported the rate of selling sex for drugs reduced from 1.9-24.0% to 0.5-1.5% after MMT intervention.<sup>32 34 42 47 49 52</sup>

### **Social functioning**

Employment rate among clients had been improved after receiving MMT. The overall employment rate increased from 26.4% (95% CI: 22.9-30.1%) at baseline (Table 1, Figure 4), to 41.6% (95% CI: 36.6-48.0%) after 6 months of treatment, and further increased to 59.8% (95% CI: 52.4-66.8%) after 12 months, but slightly decreased to 55.4% (95% CI: 48.2-62.3%) over 12 months.

### **Family relations**

Family relations among clients had also been improved after receiving MMT. In addition, only 37.9% (95% CI: 32.0-44.2%) (Table 1, Figure 5) drug users reporting having a good relationship with their family before receiving MMT interventions; however, this rate significantly increased to 59.6% (95% CI: 48.1-70.2%) after 6 months, to 75.0% (95% CI: 69.0-80.2%) after 12 months, and to 83.2% (95% CI: 77.8-87.6%) after >12 months of treatment.



### Contacting with former drug-user friends

Furthermore, about 31.0% of clients (95% CI: 25.7-36.8%) (Table 1, Figure 6) met their former drug-user friends every day at baseline; however, the rate of contacting with former drug-user friends reduced to 6.5% (95% CI: 4.4-9.4%), 7.7% (95% CI: 1.4-33.2%), 1.0% (95% CI: 0.1-6.6%) after 6, 12, >12 months of intervention, respectively.

## DISCUSSION

To our best knowledge, this is the first study to review how MMT intervention could influence the changes of social functioning and family relations among drug users in MMT clinics in China. Our results showed MMT could significantly reduce the self-reported arrest rate, sold drugs, drug-related crime activities, selling sex for drugs and met their former drug-user friends every day and improve employment rate and family relations, these results are consistent with some studies in other countries such as England, Lithuania and Israel.<sup>53-56</sup> However, some researchers might remain to have strong moral reservations about MMT. They usually focused on the physically dependent nature of methadone and the possibility that the MMT programs would have to depend on the support of the government or public funds.<sup>57</sup> Thus, further studies are required to evaluate methadone maintenance treatment, and it is necessary to have a comprehensive evaluation of its cost-effectiveness, which can assist and inform the policy makers in decision making in the future.

Many drug users attempted to use different illegal activities (i.e. robbery, theft) for the exchange of drugs. MMT can reduce drug-related criminal behaviours.<sup>58</sup> Consistent with our results, a meta-analysis conducted by Marsch showed that 85% of drug users who attended MMT have reduced drug-related crime.<sup>59</sup> A systematic review conducted by Holloway and his colleagues also showed that clients in MMT program had less criminal behaviour than the non-MMT drug users.<sup>60</sup>

In our study, the employment rate increased after receiving MMT intervention in China. Similarly, a study in Sweden showed that approximately 80% of severe heroin addicts received new jobs or learned opportunities to get rid of drug abuse and return to society after receiving MMT intervention.<sup>61</sup> Another study conducted in the USA also indicated a significant improvement in employment outcomes with an integrated drug counseling and employment intervention for methadone clients.<sup>62</sup> In Sweden, Blix<sup>61</sup> conducted a 24-year follow-up study among 345 heroin addicts during 1966-1989 and found that 70%-80% of the clients have a fixed or temporary work after 5-year follow-up. However, it is interesting that with the prolongation of the treatment, the employment rate after 12 months treatment was even

1  
2  
3 higher than that after more than 12 months treatment. And the same results appeared in another survey  
4 of first eight pilot methadone maintenance treatment clinics in China.<sup>63</sup> A reasonable explanation can  
5 be that client drop-out is very common issue in MMT clinics, and the highest drop-out rate happened  
6 between 12 and 18 months.<sup>64</sup> Heroin users also reported improved relations with their families after enrolling  
7 in the MMT program.<sup>65</sup>

8  
9  
10 It is suggested MMT program should not only focus on the reduction of drug abuse, other advisory  
11 services such as providing Voluntary Counseling and Testing (VCT) of HIV, nursing intervention,  
12 psychological intervention, family intervention should also be complemented in the program  
13 simultaneously.<sup>66 67</sup> At the same time, clients should be encouraged to take advantage of these  
14 rehabilitation facilities to improve the consciousness of safeguarding their own rights and interests. It is  
15 completely possible for the drug users to get rid of drug abuse in the MMT program with these  
16 interventions, so that they can return to society as individuals with productive and worthwhile skills in  
17 the community.

18  
19  
20 Several limitations in this study should be noted. First, by the end of November 2010, there were  
21 totally 696 MMT clinics in China, covering 27 Chinese provinces,<sup>28</sup> however, out of which, 14  
22 provinces did not publish any reports on the related characteristics of social and familial relationship  
23 and this limits our analysis in these regions. Second, only six studies reported clients who sold drugs  
24 and only eight studies reported the proportion of drug users who met former drug-user friends every day.  
25 Small number of studies could lead to information bias in our study. Third, We merged about 15.4%  
26 studies which had more than 12 months (i.e. 24 months, 36 month) of follow-up in this study. However,  
27 it may affect the long-term follow-up information. Fourth, our study results may have publication bias  
28 because some data may exist but have not been published or detected by our search strategy. Fifth,  
29 substantial heterogeneity existed between studies due to different study methodologies, method of  
30 recruitment and sampling sizes in different studies. Our meta-analyses could not take all of these  
31 variations across individual studies into account. Sixth, limited reports about the related characteristics of  
32 social and familial relationship in recent years and the reports' delay in publication are also the potential  
33 factor affecting our results.

1  
2  
3  
4  
5 **Ethics** An ethics statement was not required for this work.  
6

7 **Acknowledgments** The authors thank all the participants and staff in the study. Additional thanks  
8 Yan-xian Liang and Ya-fei Wang (Department of Epidemiology and Health Statistic, School of Public  
9 Health, Nantong University) for data analysis.  
10  
11

12  
13 **Contributors** EPFC, LZ and XZ designed the study. HMS and XYL performed the data collection  
14 and provided the first draft of manuscript. YHL and TT performed data analysis. LZ and EPFC assisted  
15 with data interpretation. EPFC, LZ and XZ provided critical revision for important intellectual content.  
16  
17 All authors read and approved the final version of manuscript.  
18  
19

20  
21 **Funding** This work was supported by grants from Round 8 of the Australian Leadership Awards  
22 (ALA) Fellowships Program and Overseas Scholarship of Jiangsu Government, China and the National  
23 Natural Science Foundation of China (81373060).  
24  
25

26  
27 **Competing interests** None.  
28  
29

30 **Data Sharing Statement:** No additional data are available.  
31  
32  
33  
34  
35  
36  
37  
38  
39  
40  
41  
42  
43  
44  
45  
46  
47  
48  
49  
50  
51  
52  
53  
54  
55  
56  
57  
58  
59  
60

## REFERENCES

1. Zhuang X, Liang Y, Chow EP, *et al.* HIV and HCV prevalence among entrants to methadone maintenance treatment clinics in China: a systematic review and meta-analysis. *BMC Infect Dis* 2012;12:130.
2. Zhuang X, Wang Y, Chow EP, *et al.* Risk factors associated with HIV/HCV infection among entrants in methadone maintenance treatment clinics in China: A systematic review and meta-analysis. *Drug Alcohol Depend* 2012;126:286-95.
3. Kulsudjarit K. Drug problem in southeast and southwest Asia. *Ann N Y Acad Sci* 2004;1025:446-57.
4. Qian HZ, Schumacher JE, Chen HT, *et al.* Injection drug use and HIV/AIDS in China: review of current situation, prevention and policy implications. *Harm Reduct J* 2006; 3:4.
5. Ball AL, Rana S, Dehne KL. HIV prevention among injecting drug users: responses in developing and transitional countries. *Public Health Rep* 1998;113(Suppl 1):170-81.
6. Stimson GV. Has the United Kingdom averted an epidemic of HIV-1 among drug injectors? *Addiction* 1996;91:1085-89.
7. Ttrathdee SA, Vlahov D. The effectiveness of needle exchange programs: A review of the science and policy. *AIDScience* 2001;1:1-31.
8. Dole VP, Nyswander M. A medical treatment for diacetylmorphine (heroin) addiction. *JAMA* 1965;193:646.
9. Isbell H, Vogel VH. The addiction liability of methadone (amidone, dolophine, 10820) and its use in the treatment of the morphine abstinence syndrome. *Am J of psychiatry* 1949;105:909.
10. Parrino MW. State methadone treatment guidelines. US Department of Health and Human Services, Public Health Service, Substance Abuse and Mental Health Services Administration, Center for Substance Abuse Treatment. 1993.
11. Gambashidze N, Sikharulidze Z, Piralishvili G, *et al.* Evaluation of pilot methadone maintenance therapy in Georgia (Caucasus). *Georgian Med News* 2008;160:25.
12. Tran BX, Ohinmaa A, Duong AT, *et al.* Changes in drug use are associated with health-related quality of life improvements among methadone maintenance patients with HIV/AIDS. *Qual Life Res* 2012;21:613-23.
13. Ball JC, Ross A. *The effectiveness of methadone maintenance treatment: Patients, programs, services, and outcome.* New York: Springer-Verlag Publishing, 1991.
14. Dole VP, Joseph H. Long-term outcome of patients treated with methadone maintenance. *Ann N Y Acad Sci* 1978;311:181-96.
15. Gearing FR, Schweitzer MD. An epidemiologic evaluation of long-term methadone maintenance treatment for heroin addiction. *Am J Epidemiol* 1974;100:101.
16. Appel PW, Joseph H, Kott A, *et al.* Selected in-treatment outcomes of long-term methadone maintenance treatment patients in New York State. *Mt Sinai J Med* 2001;68:55-61.
17. Bertschy G. Methadone maintenance treatment: an update. *Eur Arch Psychiatry Clin Neurosci* 1995;245:114-24.
18. Fiellin DA, O'Connor PG, Chawarski M, *et al.* Methadone maintenance in primary care: a randomized controlled trial. *JAMA* 2001;286:1724-31.
19. Hartel DM, Schoenbaum EE. Methadone treatment protects against HIV infection : two decades of experience in the Bronx, New York City. *Public Health Reports* 1998;113:107.

- 1
  - 2
  - 3
  - 4
  - 5
  - 6
  - 7
  - 8
  - 9
  - 10
  - 11
  - 12
  - 13
  - 14
  - 15
  - 16
  - 17
  - 18
  - 19
  - 20
  - 21
  - 22
  - 23
  - 24
  - 25
  - 26
  - 27
  - 28
  - 29
  - 30
  - 31
  - 32
  - 33
  - 34
  - 35
  - 36
  - 37
  - 38
  - 39
  - 40
  - 41
  - 42
  - 43
  - 44
  - 45
  - 46
  - 47
  - 48
  - 49
  - 50
  - 51
  - 52
  - 53
  - 54
  - 55
  - 56
  - 57
  - 58
  - 59
  - 60
20. Hubbard RL, Craddock SG, Flynn PM, *et al.* Overview of 1-year follow-up outcomes in the drug abuse treatment outcome study (DATOS). *Psychol Addict Behav* 1997;11:261-78.
21. Joseph H, Woods J. A point in time: the impact of expanded methadone maintenance treatment on citywide crime and public health in New York City 1971-1973. *Arch public health* 1995;53:215-31.
22. Joseph H, Stancliff S, Langrod J. Methadone maintenance treatment (MMT): a review of historical and clinical issues. *Mt Sinai J Med* 2000;67:347-64.
23. Michels II, Stover H, Gerlach R. Substitution treatment for opioid addicts in Germany. *Harm Reduct J* 2007;4:5.
24. Pang L, Hao Y, Mi GD, *et al.* Effectiveness of first eight methadone maintenance treatment clinics in China. *AIDS* 2007;21(Suppl 8):103-07.
25. Ward J, Hall W, Mattick RP. Role of maintenance treatment in opioid dependence. *Lancet* 1999; 353:221-26.
26. Wu Z. *Landmark government methadone maintenance program in mainland China*. 15th International AIDS Conference. 2004.
27. Wu Z. *Methadone maintenance program in mainland China: from pilot to scale-up*. International Conference on the Reduction of Drug Related Harm. 20-24. 2005.
28. Ministry of Health. China has established key areas of drug addiction treatment covered by the network. [http://www.govcn/jrzg/2010-12/14/content\\_1765546.htm](http://www.govcn/jrzg/2010-12/14/content_1765546.htm) (accessed 16 Aug, 2013).
29. Wu Z, Sullivan SG, Wang Y, *et al.* Evolution of China's response to HIV/AIDS. *Lancet* 2007;369: 679-90.
30. Musa R, Bakar AZA, Khan UA. Two-Year Outcomes of Methadone Maintenance Therapy at a Clinic in Malaysia. *Asia Pac J Public Health* 2012;24:826-32.
31. Keen J, Rowse G, Mathers N, *et al.* Can methadone maintenance for heroin-dependent patients retained in general practice reduce criminal conviction rates and time spent in prison? *Br J Gen Pract* 2000;50:48.
32. Chen B, Zhou BQ, Zhang HY, *et al.* Effective Evaluation of Methadone Maintenance Treatment Among Drug Users in Zhuhai. *Pract Prev Med* 2011;18:364-65.
33. Duan YJ, Yin ZL, Xi CH, *et al.* Effect assessment of methadone maintenance treatment among heroin addicts in Ruili city. *Chin J AIDS STD* 2008;14:240-42.
34. Feng SQ, Zhou JB, Guo YL, *et al.* Effective evaluation of community-based methadone maintenance treatment for heroin addicts. *Chin J Public Health* 2010;26:924-25.
35. Lu JJ. Survey analysis on opiate addicts' Behaviors before and after Methadone maintenance treatment. *J Liaoning Med Univ* 2010;31:541-43.
36. Tang XY, Hou SQ, Tang JH. Hunan Beihu methadone maintenance treatment in socio-economic evaluation. *Chin J Drug Depend* 2008;17:380-82.
37. Zhang J, Xu YK, Li LM, *et al.* Evaluation of the effect of methadone maintenance treatment among heroin addicts. *Chin J Abuse Prev Treat* 2008;14:318-20.
38. Zhao YT, Xu HF, Fan LR. Evaluation for the Community-Based Methadone Maintenance Treatment in Guangzhou City. *J Trop Med* 2009;9:329-31.
39. Chen W, Ling L, He Q, *et al.* Performance evaluation and policy recommendations on community methadone maintenance treatment in Guangdong Province. *Chin J Health Policy* 2010;3:39-44.
40. Xue LY, Xu CL, Pan QC, *et al.* Evaluation of the therapeutic effect of methadone maintenance in 115 cases of heroin addicts. *Chin J Drug Abuse Prev Treat* 2006;12:255-57.

- 1
  - 2
  - 3
  - 4
  - 5
  - 6
  - 7
  - 8
  - 9
  - 10
  - 11
  - 12
  - 13
  - 14
  - 15
  - 16
  - 17
  - 18
  - 19
  - 20
  - 21
  - 22
  - 23
  - 24
  - 25
  - 26
  - 27
  - 28
  - 29
  - 30
  - 31
  - 32
  - 33
  - 34
  - 35
  - 36
  - 37
  - 38
  - 39
  - 40
  - 41
  - 42
  - 43
  - 44
  - 45
  - 46
  - 47
  - 48
  - 49
  - 50
  - 51
  - 52
  - 53
  - 54
  - 55
  - 56
  - 57
  - 58
  - 59
  - 60
41. Liu JK, Li LH, Chen YH, *et al.* Evaluati on of Methadone Maintenance Treatment for Heroin Users in Panzhihua. *J Prev Med Inf* 2009;25:723-25.
42. Fu LP, Li F, Zhang ZZ, *et al.* Effective evaluation on parts of community-based methadone maintenance treatment clinics for heroin addicts in Xinjiang. *Endem Dis Bull* 2007;22:17-19.
43. Moher D, Liberati A, Tetzlaff J, *et al.* Preferred reporting items for systematic reviews and meta-analyses: the PRISMA statement. *PLoS Med* 2009;6:e1000097.
44. Boyle MH. Guidelines for evaluating prevalence studies. *Evidence Based Metal Health* 1998;1:37-39.
45. Guo W, Qu SQ, Ding ZW, *et al.* Situations and trends of HIV and syphilis infections among drug users in China, 1995-2009. *Chin J Epidemiol* 2010;31:666-69.
46. Jia MH, Luo HB, Ma YL, *et al.* The HIV epidemic in Yunnan province, China, 1989-2007. *J Acqui Immune Defic Syndr* 2010;53(Suppl 1):34-40.
47. Chen GH, Yang HT, Qian XC, *et al.* Effectiveness evaluation of six month community-based methadone treatment in Jiangsu Province. *Chin J AIDS STD* 2008;14:590-93.
48. Guo Y, Zhang XB. Analysis of methadone maintenance treatment of AIDS demonstration areas in Yunnan province. *Chin J AIDS STD* 2007;13:7-8,14.
49. Qu BW, Gao XX, Huang MJ, *et al.* Analysis of the efficacy of methadone maintenance therapy among heroin-addicts in Jiangmen Urban. *Mod Hosp* 2009;9:142-43.
50. Wei XL, Li HX, Ma CF, *et al.* Effective evaluation of methadone maintenance treatment for heroin dependent patients in Xi'an city. *Chin J Drug Depend* 2008;17:197-200.
51. Chen W, Zhao LL, Ling L, *et al.* Effectiveness evaluation on initial methadone maintenance treatment at community clinics in Guangdong province. *Chin J Public Health* 2009;25:1416-18.
52. Jiang A, Zhao JH, Wang XZ, *et al.* Effect analysis of the heroin addicts with methadone maintenance traetment in experimental units of Wuzhong in Ningxia. *Mod Prev Med* 2009; 36:2920-22.
53. Connock M, Juarez-Garcia A, Jowett S, *et al.* Methadone and buprenorphine for the management of opioid dependence: a systematic review and economic evaluation: Gray on behalf of the National Coordinating Centre for Health Technology Assessment. *Health Technol Assess* 2007;11:1-171, iii-iv.
54. Mutasa H. Risk factors associated with noncompliance with methadone substitution therapy (MST) and relapse among chronic opiate users in an Outer London community. *J Adv Nurs* 2001;35:97-107.
55. Padaiga Z, Subata E, Vanagas G. Outpatient methadone maintenance treatment program. Quality of life and health of opioid-dependent persons in Lithuania. *Medicina (Ka-unas)* 2007; 43:235-41.
56. Ponizovsky AM, Grinshpoon A. Quality of life among heroin users on buprenorphine versus methadone maintenance. *Am J Drug Alcohol Abuse* 2007;33:631-42.
57. Shi J, Zhao LY, Epstein DH, *et al.* The effect of methadone maintenance on illicit opioid use, human immunodeficiency virus and hepatitis C virus infection, health status, employment, and criminal activity among heroin abusers during 6 months of treatment in China. *J Addict Med* 2007;1:186.
58. Zeng X. The application of methadone maintenance treatment in opioid dependence therapy. *Chin J Drug Abuse Prev Treat* 2008;14:2.
59. Marsch LA. The efficacy of methadone maintenance interventions in reducing illicit opiate use,

- 1  
2  
3 HIV risk behavior and criminality: a meta-analysis. *Addiction* 1998;93:515-32.
- 4 60. Holloway KR, Bennett TH, Farrington DP. The effectiveness of drug treatment programs in  
5 reducing criminal behavior: a meta-analysis. *Psicothema* 2006;18:620-29.
- 6  
7 61. Blix O. Methadone maintenance programs in Sweden. *JAMA* 1989;261:2202.
- 8 62. Coviello DM, Zanis DA, Wesnoski SA, *et al.* An integrated drug counseling and employment  
9 intervention for methadone clients. *J Psychoactive Drugs* 2009;41:189-97.
- 10 63. Pang L, Mi GD, Wang CH, *et al.* Evaluation of first 8 pilot methadone maintenance treatment  
11 clinics in China. *Chin J Exp Clin Virol* 2007;21:2-4.
- 12  
13 64. Cao XB. Retention and Its Associated Factors among Clients of the Eight Pilot Methadone  
14 Maintenance Treatment Clinics in China: a Prospective Cohort Study. Chinese Center for Disease  
15 Control and Prevention, 2011.
- 16  
17 65. Chen G, Fujiwara T. Impact of One-Year Methadone Maintenance Treatment in Heroin Users in  
18 Jiangsu Province, China. *Substance Abuse: Research and Treatment* 2009;3:61-70.
- 19 66. Judd LL, Marston MG, Attkisson C, *et al.* Effective medical treatment of opiate addiction.  
20 National Consensus Development Panel on Effective Medical Treatment of Opiate Addiction.  
21 *JAMA* 1998;280:1936-43.
- 22  
23 67. Magura S, Nwakeze PC, Demsky SY. Pre- and in-treatment predictors of retention in methadone  
24 treatment using survival analysis. *Addiction* 1998;93:51-60.
- 25  
26 68. Fu JH, Hong LY, Li ZJ, *et al.* Investigation of intervention effects on dropouts in high risk from  
27 methadone maintenance treatment. *Jiangxi Med J* 2010;45:932-34.
- 28  
29 69. Hu WS, Wang DP, Huang X, *et al.* Analysis of the efficacy of medicine(methadone) maintenance  
30 treatment in 125 cases of heroin dependence patients. *Chin J Drug Abuse Prev Treat*  
31 2010;16:86-88.
- 32  
33 70. Liu JB, DiLiXiaTi YHP, Li F, *et al.* The effective evaluation of the methadone maintenance  
34 treatment of heroin addicts. *Chin J Drug Abuse Prev Treat* 2007;13:10-13.
- 35  
36 71. Liu YJ, Deng PX, Xiong XY, *et al.* Effective evaluation on methadone maintenance treatment in  
37 Chaoyang district, Beijing. *Chin J Drug Depend* 2007;16:302-06.
- 38  
39 72. Long ZY, Wu ZY, Du B, *et al.* Situation of 538 heroin addicts undertaking methadone  
40 maintenance treatment. *Chin J Drug Depend* 2006;15:38-40.
- 41  
42 73. Qian YH. Effect of methadone maintenance therapy on drug users in Wuxi. *Occup and Health*  
43 2008;24:450-52.
- 44  
45 74. Wang YZ, Sun J. Analysis of the efficacy of methadone maintenance treatment in 237 cases of  
46 heroin dependence patients. *Prac J Med & Pharm* 2008;25:1304-06.
- 47  
48 75. Zhang HF, Deng KW, Zhang YF, *et al.* Efficacy evaluation on methadone maintenance treatment  
49 in Hanzhou Shaanxi. *China J Drug Depend* 2009;18:43-46.
- 50  
51  
52  
53  
54  
55  
56  
57  
58  
59  
60

**Table 1** The comparison of social functioning and family relations before and after entering MMT

|                                                                  | Baseline<br>(admission to<br>MMT) | Post-intervention period |                        |                        |
|------------------------------------------------------------------|-----------------------------------|--------------------------|------------------------|------------------------|
|                                                                  |                                   | 6 months                 | 12 months              | >12 months             |
| <b>Arrested rate</b>                                             | 13.7%<br>(9.1%-20.0%)             | 3.5%<br>(1.1%-10.5%)     | 4.3%<br>(1.6%-11.4%)   | 1.4%<br>(0.5%-3.7%)    |
| <b>Proportion of selling<br/>drugs</b>                           | 7.6%<br>(3.8%-14.8%)              | 1.9%<br>(0.6%-6.2%)      | 3.0%<br>(1.0%-8.9%)    | 1.0%<br>(0.1-6.6%)     |
| <b>Employment rate</b>                                           | 26.4%<br>(22.9%-30.1%)            | 41.6%<br>(36.6%-48.0%)   | 59.8%<br>(52.4%-66.8%) | 55.4%<br>(48.2%-62.3%) |
| <b>Had a good family<br/>relation</b>                            | 37.9%<br>(32.0%-44.2%)            | 59.6%<br>(48.1%-70.2%)   | 75.0%<br>(69.0%-80.2%) | 83.2%<br>(77.8%-87.6%) |
| <b>Contacting with<br/>former drug-user<br/>friends everyday</b> | 31.0%<br>(25.7%-36.8%)            | 6.5%<br>(4.4%-9.4%)      | 7.7%<br>(1.4%-33.2%)   | 1.0%<br>(0.1%-6.6%)    |



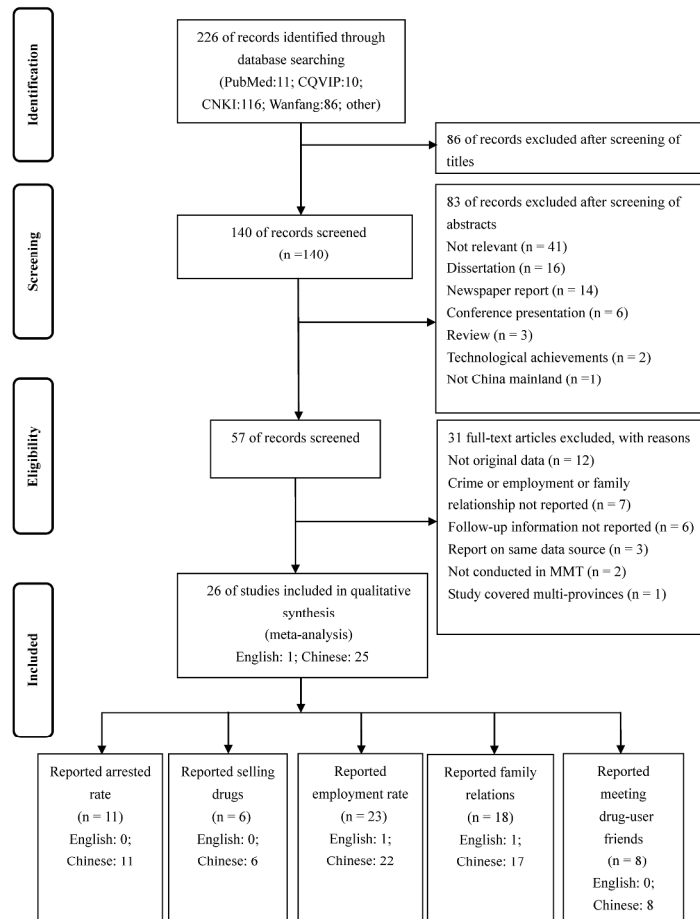

Figure 1 Flow chart showing the meta-analysis studies selection.

297x420mm (300 x 300 DPI)

1  
2  
3  
4  
5  
6  
7  
8  
9  
10  
11  
12  
13  
14  
15  
16  
17  
18  
19  
20  
21  
22  
23  
24  
25  
26  
27  
28  
29  
30  
31  
32  
33  
34  
35  
36  
37  
38  
39  
40  
41  
42  
43  
44  
45  
46  
47  
48  
49  
50  
51  
52  
53  
54  
55  
56  
57  
58  
59  
60

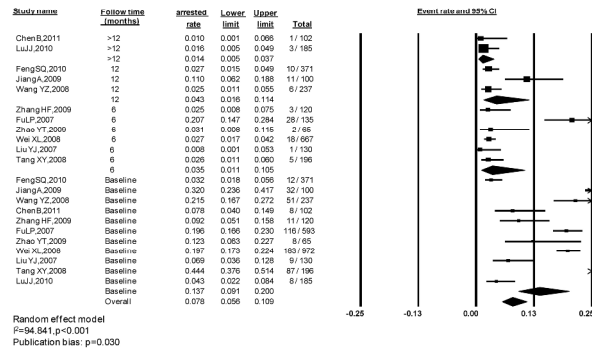

Figure 2 The rate for arrested situation among MMT clients at different intervention periods.

297x420mm (300 x 300 DPI)

1  
2  
3  
4  
5  
6  
7  
8  
9  
10  
11  
12  
13  
14  
15  
16  
17  
18  
19  
20  
21  
22  
23  
24  
25  
26  
27  
28  
29  
30  
31  
32  
33  
34  
35  
36  
37  
38  
39  
40  
41  
42  
43  
44  
45  
46  
47  
48  
49  
50  
51  
52  
53  
54  
55  
56  
57  
58  
59  
60

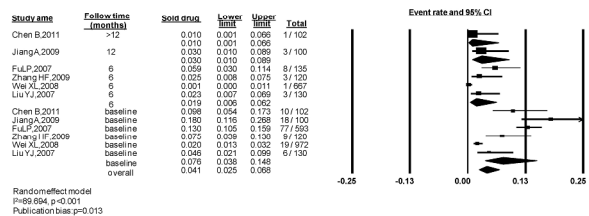

Figure 3 The rate for drug-selling among MMT clients at different intervention periods.

297x420mm (300 x 300 DPI)

1  
2  
3  
4  
5  
6  
7  
8  
9  
10  
11  
12  
13  
14  
15  
16  
17  
18  
19  
20  
21  
22  
23  
24  
25  
26  
27  
28  
29  
30  
31  
32  
33  
34  
35  
36  
37  
38  
39  
40  
41  
42  
43  
44  
45  
46  
47  
48  
49  
50  
51  
52  
53  
54  
55  
56  
57  
58  
59  
60

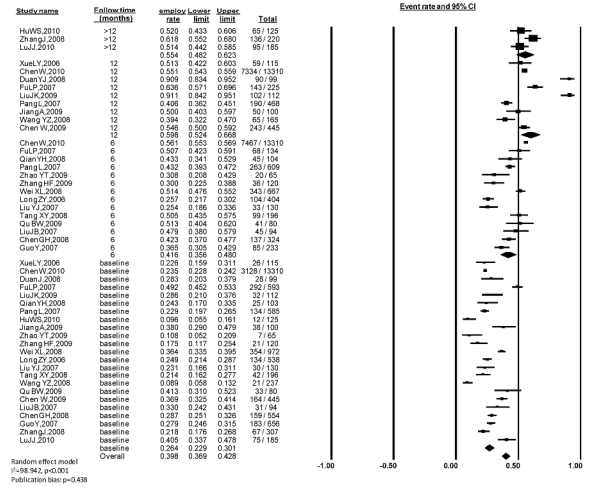

Figure 4 The employment rate among MMT clients at different intervention periods.

297x420mm (300 x 300 DPI)

1  
2  
3  
4  
5  
6  
7  
8  
9  
10  
11  
12  
13  
14  
15  
16  
17  
18  
19  
20  
21  
22  
23  
24  
25  
26  
27  
28  
29  
30  
31  
32  
33  
34  
35  
36  
37  
38  
39  
40  
41  
42  
43  
44  
45  
46  
47  
48  
49  
50  
51  
52  
53  
54  
55  
56  
57  
58  
59  
60

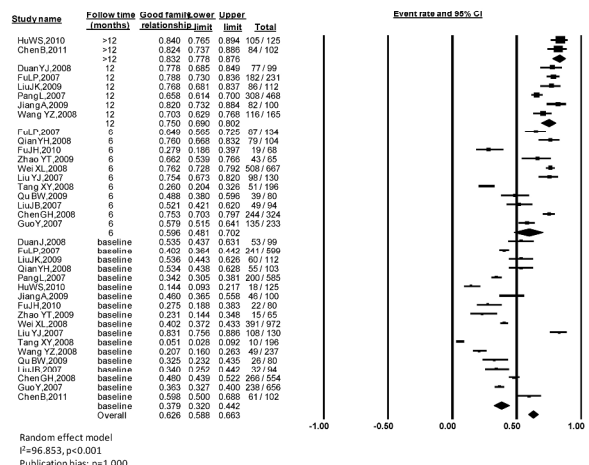

Figure 5 The rate for good relationship with family among MMT clients at different intervention periods.

MMT-Figure 5  
297x420mm (300 x 300 DPI)

1  
2  
3  
4  
5  
6  
7  
8  
9  
10  
11  
12  
13  
14  
15  
16  
17  
18  
19  
20  
21  
22  
23  
24  
25  
26  
27  
28  
29  
30  
31  
32  
33  
34  
35  
36  
37  
38  
39  
40  
41  
42  
43  
44  
45  
46  
47  
48  
49  
50  
51  
52  
53  
54  
55  
56  
57  
58  
59  
60

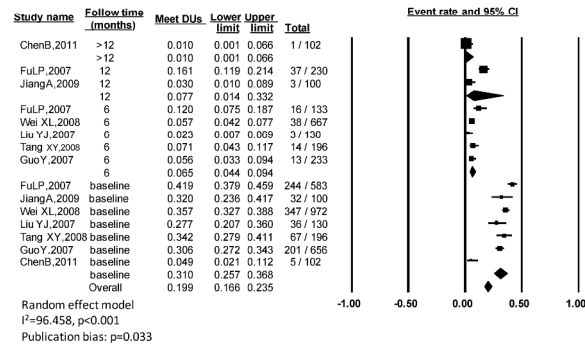

Figure 6 The clients contacting with former drug-user friends everyday at different intervention periods.

MMT-Figure 6  
 297x420mm (300 x 300 DPI)

Table S1 Studies reporting the changes in social functioning and family relations before and after entering MMT (Continued)

| First Author, Published Year | Study Period | Study Location (Province) | Sample size | Post-intervention period (month) | Change of social functioning and family relations |                     |                              |                               |                                                   | Quality Assessment Score |
|------------------------------|--------------|---------------------------|-------------|----------------------------------|---------------------------------------------------|---------------------|------------------------------|-------------------------------|---------------------------------------------------|--------------------------|
|                              |              |                           |             |                                  | Arrested rate                                     | Selling drugs       | Employment status            | Good relationship with family | Contacting with former drug-user friends everyday |                          |
| Chen B (2011) <sup>32</sup>  | 2009         | Guangdong                 | 102         | 36                               | B:8/102<br>A:1/102                                | B:10/102<br>A:1/102 |                              | B:61/102<br>A:34/102          | B:5/102<br>A:1/102                                | 4                        |
| Chen GH (2008) <sup>47</sup> | 2006         | Jiangsu                   | 554         | 6                                |                                                   |                     | B:159/554<br>A:137/324       | B:266/554<br>A:244/324        |                                                   | 3                        |
| Chen W (2009) <sup>41</sup>  | 2008         | Guangdong                 | 445         | 12                               |                                                   |                     | B:164/445<br>A:243/445       |                               |                                                   | 5                        |
| Chen W (2010) <sup>39</sup>  | 2008         | Guangdong                 | 13310       | 6                                |                                                   |                     | B:3128/13310<br>A:7467/13310 |                               |                                                   | 4                        |
| Chen W (2010) <sup>39</sup>  | 2008         | Guangdong                 | 13310       | 12                               |                                                   |                     | B:3128/13310<br>A:7334/13310 |                               |                                                   | 4                        |
| Duan YJ (2008) <sup>33</sup> | 2006         | Yunnan                    | 99          | 12                               |                                                   |                     | B:28/99<br>A:90/99           | B:53/99<br>A:77/99            |                                                   | 3                        |
| Fu LP (2007) <sup>42</sup>   | 2006         | Xinjiang                  | 958         | 6                                | B:116/593<br>A:28/135                             | B:77/593<br>A:8/135 | B:292/593<br>A:68/134        | B:241/599<br>A:87/134         | B:244/583<br>A:16/133                             | 3                        |
| Fu LP (2007) <sup>42</sup>   | 2006         | Xinjiang                  | 958         | 12                               |                                                   |                     | B:292/593<br>A:143/225       | B:241/599<br>A:182/231        | B:244/583<br>A:37/230                             | 3                        |
| Fu JH (2010) <sup>68</sup>   | 2008         | Jiangxi                   | 80          | 6                                |                                                   |                     |                              | B:22/80<br>A:19/68            |                                                   | 4                        |
| Feng SQ (2010) <sup>34</sup> | 2008         | Jiangsu                   | 371         | 12                               | B:12/371<br>A:10/371                              |                     |                              |                               |                                                   | 4                        |
| Guo Y (2007) <sup>48</sup>   | 2006         | Yunnan                    | 656         | 6                                |                                                   |                     | B:183/656<br>A:85/233        | B:238/656<br>A:135/233        | B:201/656<br>A:13/233                             | 5                        |
| Hu WS (2010) <sup>69</sup>   | 2008         | Guangdong                 | 125         | 22                               |                                                   |                     | B:12/125<br>A:65/125         | B:18/125<br>A:105/125         |                                                   | 4                        |

MMT-Table S1(1)  
209x148mm (300 x 300 DPI)

view only

Table S1 Studies reporting the changes in social functioning and family relations before and after entering MMT (Continued)

| First Author,<br>Published Year | Study<br>Period | Study<br>Location<br>(Province) | Sample<br>size | Post-intervention<br>period<br>(month) | Change of social functioning and family relations |                     |                        |                                     |                                                                  | Quality<br>Assessment<br>Score |
|---------------------------------|-----------------|---------------------------------|----------------|----------------------------------------|---------------------------------------------------|---------------------|------------------------|-------------------------------------|------------------------------------------------------------------|--------------------------------|
|                                 |                 |                                 |                |                                        | Arrested<br>rate                                  | Selling<br>drugs    | Employment<br>status   | Good<br>relationship<br>with family | Contacting<br>with<br>former<br>drug-user<br>friends<br>everyday |                                |
| Jiang A (2009) <sup>52</sup>    | 2007            | Ningxia                         | 100            | 12                                     | B:32/100<br>A:11/100                              | B:18/100<br>A:3/100 | B:38/100<br>A:50/100   | B:46/100<br>A:82/100                | B:32/100<br>A:3/100                                              | 4                              |
| Liu JB (2007) <sup>70</sup>     | 2005            | Xinjiang                        | 170            | 6                                      |                                                   |                     | B:31/94<br>A:45/94     | B:32/94<br>A:49/94                  |                                                                  | 4                              |
| Liu JK (2009) <sup>41</sup>     | 2006            | Sichuan                         | 112            | 12                                     |                                                   |                     | B:32/112<br>A:102/112  | B:60/112<br>F86/112                 |                                                                  | 3                              |
| Liu YJ (2007) <sup>71</sup>     | 2007            | Beijing                         | 130            | 6                                      | B:9/130<br>A:1/130                                | B:6/130<br>A:3/130  | B:30/130<br>A:33/130   | B:108/130<br>A:98/130               | B:36/130<br>A:3/130                                              | 3                              |
| Lu JJ (2010) <sup>35</sup>      | 2010            | Jiangsu                         | 185            | 36                                     | B:8/185<br>A:3/185                                |                     | B:75/185<br>A:95/185   |                                     |                                                                  | 5                              |
| Long ZY (2006) <sup>72</sup>    | 2005            | Guizhou                         | 538            | 6                                      |                                                   |                     | B:134/538<br>A:104/404 |                                     |                                                                  | 4                              |
| Pang L (2007) <sup>24</sup>     | 2004            | Guizhou                         | 609            | 6                                      |                                                   |                     | B:134/585<br>A:263/609 |                                     |                                                                  | 5                              |
| Pang L (2007) <sup>24</sup>     | 2004            | Beijing                         | 468            | 12                                     |                                                   |                     | B:134/585<br>A:190/468 | B:200/585<br>A:308/468              |                                                                  | 5                              |
| Qian YH (2008) <sup>73</sup>    | 2007            | Jiangsu                         | 965            | 6                                      |                                                   |                     | B:25/103<br>A:45/104   | B:55/103<br>A:79/104                |                                                                  | 4                              |
| Qu BW (2009) <sup>49</sup>      | 2007            | Guangdong                       | 80             | 6                                      |                                                   |                     | B:33/80<br>A:41/80     | B:26/80<br>A:39/80                  |                                                                  | 6                              |
| Tang XY (2008) <sup>36</sup>    | 2006            | Hunan                           | 196            | 6                                      | B:87/196<br>A:5/196                               |                     | B:42/196<br>A:99/196   | B:10/196<br>A:51/196                | B:67/196<br>A:14/196                                             | 3                              |
| Wang YZ (2008) <sup>74</sup>    | 2007            | Zhejiang                        | 237            | 12                                     | B:51/237<br>A:6/237                               |                     | B:21/237<br>A:65/165   | B:49/237<br>A:116/165               |                                                                  | 3                              |

MMT-Figures and Table S1(2)  
209x148mm (300 x 300 DPI)



Table S1 Studies reporting the changes in social functioning and family relations before and after entering MMT (Continued)

| First Author,<br>Published Year | Study<br>Period | Study<br>Location<br>(Province) | Sample<br>size | Post-intervention<br>period<br>(month) | Change of social functioning and family relations |                     |                        |                                     |                                                                  | Quality<br>Assessment<br>Score |
|---------------------------------|-----------------|---------------------------------|----------------|----------------------------------------|---------------------------------------------------|---------------------|------------------------|-------------------------------------|------------------------------------------------------------------|--------------------------------|
|                                 |                 |                                 |                |                                        | Arrested<br>rate                                  | Selling<br>drugs    | Employment<br>status   | Good<br>relationship<br>with family | Contacting<br>with<br>former<br>drug-user<br>friends<br>everyday |                                |
| Wei XL (2008) <sup>50</sup>     | 2007            | Shaanxi                         | 972            | 6                                      | B:183/972<br>A:18/667                             | B:19/972<br>A:1/667 | B:354/972<br>A:343/667 | B:391/972<br>A:508/667              | B:347/972<br>A:38/667                                            | 5                              |
| Xue LY (2006) <sup>49</sup>     | 2006            | Shanghai                        | 115            | 12                                     |                                                   |                     | B:26/115<br>A:59/115   |                                     |                                                                  | 4                              |
| Zhao YT (2009) <sup>58</sup>    | 2006            | Guangdong                       | 65             | 6                                      | B:8/65<br>A:2/65                                  |                     | B:7/65<br>A:20/65      | B:15/65<br>A:43/65                  |                                                                  | 6                              |
| Zhang HF (2009) <sup>75</sup>   | 2008            | Shaanxi                         | 120            | 6                                      | B:11/120<br>A:3/120                               | B:9/120<br>A:3/120  | B:21/120<br>A:36/120   |                                     |                                                                  | 4                              |
| Zhang J (2008) <sup>57</sup>    | 2007            | Jiangsu                         | 307            | 20                                     |                                                   |                     | B:67/307<br>A:136/220  |                                     |                                                                  | 5                              |

Note: B=Before entering MMT program; A=After entering MMT program

Table S1(3)  
209x148mm (300 x 300 DPI)

# BMJ Open

## Methadone maintenance treatment programme reduces criminal activities and improve social wellbeing of drug users in China: a systematic review and meta-analysis

|                                 |                                                                                                                                                                                                                                                                                                                                                                                                                                                                                                                   |
|---------------------------------|-------------------------------------------------------------------------------------------------------------------------------------------------------------------------------------------------------------------------------------------------------------------------------------------------------------------------------------------------------------------------------------------------------------------------------------------------------------------------------------------------------------------|
| Journal:                        | <i>BMJ Open</i>                                                                                                                                                                                                                                                                                                                                                                                                                                                                                                   |
| Manuscript ID:                  | bmjopen-2014-005997.R1                                                                                                                                                                                                                                                                                                                                                                                                                                                                                            |
| Article Type:                   | Research                                                                                                                                                                                                                                                                                                                                                                                                                                                                                                          |
| Date Submitted by the Author:   | 24-Nov-2014                                                                                                                                                                                                                                                                                                                                                                                                                                                                                                       |
| Complete List of Authors:       | Sun, Huamin; Nantong University, School of Public Health<br>Li, XiaoYan; Nantong University, School of Public Health<br>Chow, Eric; The Kirby Institute, University of New South Wales; Melbourne Sexual Health Centre, Alfred Health<br>Li, Tong<br>Xian, Yun<br>Lu, YiHua; Nantong University, School of Public Health<br>Tian, Tian; Nantong University, School of Public Health<br>Zhang, Lei; The Kirby Institute, University of New South Wales<br>Zhuang, Xun; Nantong University, School of Public Health |
| <b>Primary Subject Heading</b>: | Public health                                                                                                                                                                                                                                                                                                                                                                                                                                                                                                     |
| Secondary Subject Heading:      | Epidemiology, Public health                                                                                                                                                                                                                                                                                                                                                                                                                                                                                       |
| Keywords:                       | PUBLIC HEALTH, Epidemiology < INFECTIOUS DISEASES, HIV & AIDS < INFECTIOUS DISEASES                                                                                                                                                                                                                                                                                                                                                                                                                               |
|                                 |                                                                                                                                                                                                                                                                                                                                                                                                                                                                                                                   |

SCHOLARONE™  
Manuscripts

1  
2  
3 **Methadone maintenance treatment programme reduces criminal activities and**  
4 **improve social wellbeing of drug users in China: a systematic review and**  
5 **meta-analysis<sup>1</sup>**  
6  
7  
8  
9

10 Hua-Min Sun<sup>1\*</sup>

11 Email: huamin2380@163.com

12 Xiao-Yan Li<sup>1\*</sup>

13 Email: sqzr357@126.com

14 Eric PF Chow<sup>2,3,4</sup>

15 Email: echow@mshc.org.au

16 Tong Li<sup>1</sup>

17 Email: Jin0925@126.com

18 Yun Xian<sup>1</sup>

19 Email: xianyun61@126.com

20 Yi-Hua Lu<sup>1</sup>

21 Email: 23291828@qq.com

22 Tian Tian<sup>1</sup>

23 Email: ttypes\_01@163.com

24 Xun Zhuang<sup>1†</sup>

25 Email: ntzhuang@163.com

26 Lei Zhang<sup>1,2†</sup>

27 Email: lzhang@kirby.unsw.edu.au

28  
29  
30  
31  
32  
33  
34  
35  
36  
37  
38  
39  
40  
41  
42  
43  
44  
45  
46  
47 **Word count: 2,770**

48  
49 <sup>1</sup> Department of Epidemiology and Biostatistics, School of Public Health, Nantong University,  
50 Jiangsu 226019, China

51 <sup>2</sup> The Kirby Institute, University of New South Wales, Sydney, NSW, Australia

52 <sup>3</sup> Melbourne Sexual Health Centre, Alfred Health, Melbourne, Victoria, Australia  
53  
54  
55  
56  
57  
58  
59  
60

1  
2  
3 <sup>4</sup> Central Clinical School, Faculty of Medicine, Nursing and Health Sciences, Monash University,  
4 Melbourne, Victoria, Australia  
5  
6

7 \*HMS and XYL are joint first authors.

8 † LZ (lzhang@kirby.unsw.edu.au) and XZ (ntzhuang@163.com) are joint corresponding authors.

9  
10 Correspondence: Department of Epidemiology and Biostatistics, School of Public Health, Nantong  
11 University. Nantong 226019, Jiangsu, China. Phone (Fax): +86-513-85012902; The Kirby Institute,  
12 University of New South Wales, Sydney, NSW, Australia. Phone: +612 9385 0869 Fax: +612 9385  
13 0920.  
14  
15  
16  
17  
18  
19  
20  
21  
22  
23  
24  
25  
26  
27  
28  
29  
30  
31  
32  
33  
34  
35  
36  
37  
38  
39  
40  
41  
42  
43  
44  
45  
46  
47  
48  
49  
50  
51  
52  
53  
54  
55  
56  
57  
58  
59  
60

## ABSTRACT

**Objective:** Methadone maintenance treatment (MMT) has been implemented in China since 2004 and has expanded into a nationwide program. The study aims to evaluate the changes in social functioning, family relations and drug-related criminal behaviours among MMT clients in China.

**Design:** Systematic review and meta-analysis.

**Methods:** Both English and Chinese literature databases, including PubMed, Chongqing VIP Chinese Science and Technology Journals Database (CQVIP), China National Knowledge Infrastructure (CNKI) and Wanfang Data, were comprehensively searched over the period 2004-2014 for studied indicators. Study selection, quality assessment and data extraction were conducted according to Preferred Reporting Items for Systematic Reviews and Meta-Analyses. Meta-analyses were conducted using Comprehensive Meta-Analysis Biostat software.

**Results:** Thirty-eight articles were included in this review (1 in English and 37 in Chinese). The self-reported arrest rate reduced from 13.7% (95% CI: 9.1-20.0%) at baseline, to 3.5% (1.1-10.5%), and to 4.3% (1.6-11.4%) after 6, and 12-month MMT intervention, respectively. The rate for drug-selling reduced from 7.6% (3.8-14.8%) at baseline, to 1.9% (0.6-6.2%), and to 3.0% (1.0-8.9%) after 6, and 12-month of intervention, respectively. Similarly, the rates of selling sex for drugs and drug-related crime reduced from 5.3% (2.4%-11.1%) and 9.9% (6.8%-14.2%) at baseline, to 1.1% (0.5%-2.3%) and 3.4% (2.5%-4.5%) at 6-month, then to 0.8% (0.3%-1.9%) and 3.4% (0.8%-13.1%) at 12-month after treatment initiation, respectively. In contrast, employment rate of clients and proportion of clients having a good relationship with family increased substantially from 26.4% (22.9-30.1%) and 37.9% (32.0-44.2%), to 41.6% (36.6-48.0%) and 59.6% (48.1-70.2%) at 6-month, then to 59.8% (52.4-66.8%) and 75.0% (69.0-80.2%) at 12-month after treatment initiation.

**Conclusions:** MMT has significantly reduced the criminal activities and improved employment rate and social wellbeing of MMT clients. MMT is an effective measure to help drug users to resume

1  
2  
3  
4 societal and familial functions in China.  
5  
6  
7  
8  
9  
10  
11  
12  
13  
14  
15  
16  
17  
18  
19  
20  
21  
22  
23  
24  
25  
26  
27  
28  
29  
30  
31  
32  
33  
34  
35  
36  
37  
38  
39  
40  
41  
42  
43  
44  
45  
46  
47  
48  
49  
50  
51  
52  
53  
54  
55  
56  
57  
58  
59  
60

For peer review only

## KEY WORDS

Criminal activities, Social functioning and family relations, Changes, Methadone maintenance treatment, Meta-analysis, China

## Strengths and limitations of this study

- This is the first study to review how MMT intervention could influence the changes of social functioning and family relations among drug users in MMT clinics in China.
- This study evaluated the changes in drug-related criminal behaviours, improvements in social functioning and family relations among drug users before and after entering the MMT interventions through a meta-analysis of published literature since 2004 in China.
- The number of studies is limited and may lead to issues on representativeness of the large drug user population in China.

## INTRODUCTION

Illicit drug abuse is a social and public health issue internationally. It not only increases the risks of disease transmission such as HIV and hepatitis C virus (HCV),<sup>1 2</sup> but also enhances drug-related criminal activities, family issues, and excessive health care expenditures.<sup>3 4</sup> Heroin is the most common drug used among drug users in both developed and developing countries.<sup>5-7</sup> Methadone maintenance treatment (MMT) has been found to be an effective harm reduction program for drug users.<sup>8-10</sup> Methadone is a safe, low-cost and convenient generic drug for treatment of opioid dependence.<sup>11 12</sup> It effectively reduced drug-related mortality<sup>13-15</sup> drug-related crimes and help drug users to resume social and familial functions.<sup>16-25</sup>

In 2004, eight out-patient MMT clinics were established in China<sup>26 27</sup> and lately expanded into a nationwide program encompassing more than 756 MMT clinics in China, covering 28 Chinese provinces by 2012. It has been shown that the pilot of these eight MMT clinics has significantly improved the social functioning among MMT clients. Annual employment rate were reportedly increased from 22.9% to 40.6% ( $P < 0.01$ , compared with the baseline survey); and the proportion of clients having a harmonious relationship with families increased from 49.6% to 65.8% ( $P < 0.01$ ) after receiving the MMT programs for 12 months. Self-reported criminal behaviour of clients has also reduced from 20.7% to 3.8% ( $P < 0.01$ ).<sup>24</sup> Similar benefits of MMT were also reported in other countries. For instance, the employment rate of MMT clients Malaysia increased from 70.1% to 77.6% after two years of treatment.<sup>28</sup> A retrospective study in UK also showed that the total number of convictions, theft and fraud convictions, weeks spent in prison per year were reduced by 39.3% ( $P = 0.03$ ), 52.17% ( $P < 0.001$ ), 82.8% ( $P = 0.002$ ), respectively.<sup>29</sup>

Numerous studies have reported improvements in social and family wellbeing among MMT clients



1  
2  
3 in China, but a systematic review that synthesises all these impacts remained absent. This study aims to  
4  
5  
6 evaluate the changes in drug-related criminal behaviours, improvements in social functioning and  
7  
8  
9 family relations among drug users before and after entering the MMT interventions through a  
10  
11 meta-analysis of published literature since 2004 in China.  
12  
13  
14  
15  
16  
17  
18  
19  
20  
21  
22  
23  
24  
25  
26  
27  
28  
29  
30  
31  
32  
33  
34  
35  
36  
37  
38  
39  
40  
41  
42  
43  
44  
45  
46  
47  
48  
49  
50  
51  
52  
53  
54  
55  
56  
57  
58  
59  
60

For peer review only

## METHODS

### Data sources

We conducted a systematic review of published peer-reviewed research articles by searching the following databases: PubMed, CQVIP, CNKI and Wanfang Data from January 2004 to October 2014. Keywords used in the database search included (“Methadone” OR “Methadone Maintenance Treatment” OR “Methadone Maintenance Therapy” OR “Methadone Maintenance” OR “MMT”) AND (“Crime” OR “Criminal rates” OR “Employment” OR “Family relationship” OR “Social functions”) AND (“China” OR “China Mainland” OR “Chinese”). We also performed a manual search on the reference lists of published articles. This review was reported according to the PRISMA (Preferred Reporting Items for Systematic Reviews and Meta-Analyses) Statement issued in 2009.<sup>30</sup>

### Inclusion/exclusion criteria

Studies were eligible for inclusion in this systematic review if they met the following criteria: (1) articles published in Chinese or English language; (2) study reported social functioning or family relations among clients in MMT at baseline and follow-up; and (3) reported the study characteristics such as study location, investigation period, duration of intervention, and sample size. Pre-and-post intervention studies among MMT clients were also included. Exclusion criteria were: (1) review papers; (2) non peer-reviewed local/government reports; (3) conference abstracts and presentations; and (4) dissertations. If the same data source were published in both English and Chinese sources, the articles published in Chinese language were excluded from this study.

### Study selection

1  
2  
3  
4 Selected studies were evaluated by two independent investigators (HMS, XYL) according to the  
5  
6 inclusion and exclusion criteria. Disagreement in evaluation was resolved by discussion among the  
7  
8 investigators. If the same study data were published in both English and Chinese sources, the articles  
9  
10 published in Chinese language were excluded from this study. In cases where multiple studies were  
11  
12 found to use the same data source, we selected the first published study for inclusion in the  
13  
14 meta-analysis.  
15  
16  
17  
18  
19

### 20 **Quality assessment**

21  
22  
23 Two independent investigators used a validated quality assessment tool for observational studies<sup>31</sup> to  
24  
25 assess the quality of studies. The following eight items were assessed to calculate a total quality score:  
26  
27 (1) clear definition of the target population; (2) representativeness of probability sampling; (3) sample  
28  
29 characteristics matching the overall population; (4) adequate response rate; (5) method of data  
30  
31 collection methods; (6) reliability of survey measures/instruments; (7) validity of survey  
32  
33 measures/instruments; and (8) appropriate statistical methods. Each item was scored 0 for 'No' and 1  
34  
35 for 'Yes', respectively. The total quality score ranged from 0 to 8 (Table S1).  
36  
37  
38  
39  
40  
41  
42

### 43 **Data abstraction**

44  
45 Two independent investigators extracted the following information from all eligible studies: first  
46  
47 author, year of publication, study location, investigation period, gender composition, age, sample size,  
48  
49 duration of intervention, proportion of drug-related criminal activities (including drug-trafficking,  
50  
51 selling, robbery and theft for drug), employment rate, and relationship with family among clients in  
52  
53 MMT at baseline and follow-up of treatment.  
54  
55  
56  
57  
58  
59  
60

### Statistical Analysis

Meta-analyses were carried out with the Comprehensive Meta-Analysis software (V2.0, Biostat, Englewood, New Jersey). The effect rates of pooled estimates and 95% confidence intervals (CIs) were determined based on random effect models. Heterogeneity tests were performed using the Cochran Q-test ( $P < 0.10$  represents statistically significant heterogeneity) and  $I^2$  statistic. Potential publication bias was measured by the Begg and Mazumdar rank correlation ( $P < 0.05$  represents statistically significant publication bias).

## RESULTS

### Trial Flow/Flow of included studies

According to our initial search strategies, 345 articles were identified from four electronic databases.

We excluded 128 irrelevant articles after the title screening. The remaining 217 abstracts were screened by two independent investigators (HMS, XYL), and 136 articles were excluded. 81 articles were eligible for full-text screening, of these, 43 articles were excluded. A total of 38 articles were eligible and included (1 in English, 37 in Chinese) in this review. 22 studies reported the changes in criminal activities (14 reported arrested rate, 8 reported drug-sold, 7 reported selling sex for drugs and 12 reported rate for drug-related crime), and 37 studies reported the changes in family and friends relations (37 reported employment, 28 reported relationship with family and 11 reported relationship with friends) (Figure 1).

### Study characteristics

The sample size of MMT clients reported in the eligible studies ranged from 65 to 13,310 (median: 320.5, IQR:120-651.5). A total of 30,239 participants were included in this review, and about 76.2% were male. The mean age of the total MMT clients was 34.42 years (range: 18-62 years). Of the 38 eligible articles, almost half of the studies (44.8%) were conducted in the provinces with high HIV prevalence (>20%)<sup>32,33</sup> including Yunnan, Sichuan, Guangdong, Xinjiang, Guizhou and Guangxi. The follow-up period of MMT intervention ranged from 6 to 48 months, and the majority were followed up within 12 months (86.8%). Twenty studies were prospective cohort studies, whereas others were retrospective.

### Criminal activities

1  
2  
3  
4 The criminal activities among the MMT clients had significantly reduced after receiving MMT  
5  
6 intervention. The self-reported arrest rate reduced from 13.7% (95% CI: 9.1-20.0%) at baseline (Table  
7  
8 1, Figure 2A), to 3.5% (95% CI: 1.1-10.5%), to 4.3% (95% CI: 1.6-11.4%) and to 1.4% (95% CI:  
9  
10 0.5-3.7%) at 6-, 12- and 36-months follow-up. About 7.6% (95% CI: 3.8-14.8%) of the clients who  
11  
12 had sold drugs before receiving MMT intervention (Table 1, Figure 2B), this rate was reduced to 1.9%  
13  
14 (95% CI: 0.6-6.2%) after 6 months, to 3.0% (95% CI: 1.0-8.9%) after 12 months and 1.0% (95% CI:  
15  
16 0.1-6.6%) after 36 months. The proportion of selling sex for drugs reduced from 5.3% (2.4%-11.1%)  
17  
18 at baseline, to 1.1% (0.5%-2.3%) at 6-month, to 0.8% (0.3%-1.9%) at 12-month intervention,  
19  
20 respectively (Table 1, Figure 2C). The proportion of drug-related crime also reduced from 9.9%  
21  
22 (6.8%-14.2%) at baseline, to 3.4% (2.5%-4.5%) at 6-month, to 3.4% (0.8%-13.1%) at 12-month  
23  
24 intervention, respectively (Table 1, Figure 2D). 10 studies reported the rate of drug-related crime  
25  
26 decreased from 1.1-30.34% to 0.5-3.7%. In addition, 6 studies reported the rate of selling sex for  
27  
28 drugs reduced from 1.9-24.0% to 0.5-1.5% after MMT intervention.  
29  
30  
31  
32  
33  
34  
35  
36

### 37 **Social functioning**

38 Employment rate among clients had been improved after receiving MMT. The overall employment rate  
39  
40 increased from 26.4% (95% CI: 22.9-30.1%) at baseline (Table 1, Figure 2E), to 41.6% (95% CI:  
41  
42 36.6-48.0%) after 6 months of treatment, and further increased to 59.8% (95% CI: 52.4-66.8%) after 12  
43  
44 months, but slightly decreased to 55.4% (95% CI: 48.2-62.3%) over 12 months.  
45  
46

### 47 **Family relations**

48 Family relations among clients had also been improved after receiving MMT. In addition, only 37.9%  
49  
50 (95% CI: 32.0-44.2%) (Table 1, Figure 2F) drug users reporting having a good relationship with their  
51  
52 family before receiving MMT interventions; however, this rate significantly increased to 59.6% (95% CI:  
53  
54 48.1-70.2%) after 6 months, to 75.0% (95% CI: 69.0-80.2%) after 12 months, and to 83.2% (95% CI:  
55  
56 77.8-87.6%) after >12 months of treatment.  
57  
58  
59  
60

### Contacting with former drug-user friends

Furthermore, about 31.0% of clients (95% CI: 25.7-36.8%) (Table 1, Figure 2G) met their former drug-user friends every day at baseline; however, the rate of contacting with former drug-user friends reduced to 6.5% (95% CI: 4.4-9.4%), 7.7% (95% CI: 1.4-33.2%), 1.0% (95% CI: 0.1-6.6%) after 6, 12, >12 months of intervention, respectively.

### Quality assessment

All studies reported study period, study location and sample size. All studies reached a total quality score of three or higher (out of a total of eight). The mean quality score was 3.97, indicating a reasonably good quality of our selected studies (Table S1).

## DISCUSSION

To our best knowledge, this is the first study that reviews the impacts of MMT treatment on the changes in criminal activities, social functioning and family relations among MMT clients in China.

Our findings indicated that MMT have significantly reduced self-reported arrest rate, frequencies of selling drugs, drug-related crime activities, selling sex for drugs and likelihood of meeting former drug-user friends. In contrast, it improved employment rate and family relations of MMT clients.

These findings are consistent with other international studies in England, Lithuania and Israel.<sup>34-37</sup> In particular, a meta-analysis conducted by Marsch et.al. showed that 85% of drug users who attended MMT have reduced drug-related crime.<sup>38</sup> A systematic review conducted by Holloway et.al., also showed that MMT clients have less criminal behaviour than the non-MMT drug users.<sup>39</sup> Despite these, policy makers who retain strong moral reservations about MMT would emphasise the physically dependent nature of methadone and ongoing spending of public funds on a population that is deemed as 'social evils' in many settings.<sup>40</sup> Further studies are necessary to evaluate other aspects of MMT, including structural barriers and cost-effectiveness of the program, in order to help policy makers to inform relevant polices in the future.

We demonstrated improved employment rates and family relations among MMT clients in China. Consistently, a study conducted in the United States also indicated a significant improvement in employment outcomes with an integrated drug counselling and employment programme for MMT clients.<sup>41</sup> In addition, a Swedish study showed that over 80% severe heroin addicts received new jobs and re-integrated into the society after receiving MMT.<sup>42</sup> In a separate study, Blix followed 345 heroin users for 24 years over the period 1966-1989 in Sweden. In which, a 70-80% employment rate among MMT clients was reported.<sup>42</sup> Interestingly, our meta-analysis indicated the best employment outcome



1  
2  
3  
4 at 12-month of treatment initiation and the rate started to decline when treatment continues beyond 12  
5  
6 months. This finding is echoed with findings from an early survey of first eight pilot MMT clinics in  
7  
8 China.<sup>43</sup> A plausible explanation may be that employed clients are more likely to drop-out of  
9  
10 treatment, which leads to a declining employment rate among those who sustain treatment. Further,  
11  
12 family relations of clients improved during the course of MMT. With reduced symptoms of addiction,  
13  
14 clients would be able to resume family duties and re-establish relationship with their family members.  
15  
16

17  
18  
19  
20  
21  
22  
23  
24  
25  
26  
27  
28  
29  
30  
31  
32  
33  
34  
35  
36  
37  
38  
39  
40  
41  
42  
43  
44  
45  
46  
47  
48  
49

44 45

Several limitations in this study should be noted. First, by the end of 2012, there were totally 756  
MMT clinics in China, covering 28 Chinese provinces, however, out of which, 13 provinces did not  
publish any reports on the related characteristics of social and familial relationship and this limits our  
analysis in these regions. Second, only eight studies reported clients who sold drugs. Small number of  
studies could lead to information bias in our study. Third, due to the small number of available  
studies, we pooled all study estimate beyond 12 months of follow-up in this analysis. Fourth,  
substantial heterogeneity existed between studies due to different study methodologies, method of  
recruitment and sampling sizes in different studies. Our meta-analyses could not take all of these  
variations across individual studies into account. Fifth, limited number of studies reported relevant  
characteristics of social and familial relationship in recent years and the reports' delay in publication  
may also bias our findings.

## 50 **Conclusions**

51  
52  
53 Conclusively, MMT programme in China has been shown to be effective in reducing criminal activities  
54  
55 and improving employment outcome and social wellbeing of its clients. MMT programme should not  
56  
57 only focus on the reduction of drug abuse, other advisory and intervention services, such as Voluntary  
58  
59  
60

1  
2  
3  
4 Counselling and Testing (VCT) of HIV, psychological therapy, family intervention may be integrated  
5  
6 into the program simultaneously. <sup>46 47</sup> In parallel, clients should be encouraged to make use of  
7  
8 rehabilitation facilities to improve their own awareness in safeguarding their own rights and interests.  
9  
10  
11 MMT may serve as a valuable opportunity to reduce drug-related harm among drug users and enable  
12  
13  
14 them to return to society as healthy and productive individuals.  
15  
16  
17  
18  
19  
20  
21  
22  
23  
24  
25  
26  
27  
28  
29  
30  
31  
32  
33  
34  
35  
36  
37  
38  
39  
40  
41  
42  
43  
44  
45  
46  
47  
48  
49  
50  
51  
52  
53  
54  
55  
56  
57  
58  
59  
60

1  
2  
3  
4 **Ethics** An ethics statement was not required for this work.  
5

6  
7 **Acknowledgments** The authors thank all the participants and staff in the study. Additional thanks  
8  
9 Yan-xian Liang and Ya-fei Wang (Department of Epidemiology and Health Statistic, School of Public  
10  
11 Health, Nantong University) for data analysis.  
12

13  
14  
15 **Contributors** EPFC, LZ and XZ designed the study. HMS and XYL performed the data collection  
16  
17 and provided the first draft of manuscript. TL, XY, YHL and TT performed data analysis. LZ and  
18  
19 EPFC assisted with data interpretation. EPFC, LZ and XZ provided critical revision for important  
20  
21 intellectual content. All authors read and approved the final version of manuscript.  
22  
23

24  
25  
26 **Funding** This work was supported by grants from Round 8 of the Australian Leadership Awards  
27  
28 (ALA) Fellowships Program and Overseas Scholarship of Jiangsu Government, China and the  
29  
30 National Natural Science Foundation of China (81373060).  
31

32  
33  
34 **Competing interests** None  
35

36  
37  
38 **Data Sharing Statement:** No additional data are available.  
39

40  
41  
42 **Figure legends:**

43  
44 **Figure 1** Flow chart of selection of studies.  
45

46  
47 **Figure 2** Changes in criminal activities, social wellbeing and family relations before and after MMT  
48  
49 initiation: (A) rate of being arrested by police; (B) rate of drug-selling; (C) rate for selling sex for  
50  
51 drugs; (D) rate for drug-related crime, (E) employment rate; (F) rate of having good relationship with  
52  
53 family; (G) proportion of clients having contacts with former drug-user friends on a daily basis,  
54  
55 among Chinese MMT clients at various intervention periods.  
56  
57  
58  
59  
60

1  
2  
3  
4  
5  
6  
7  
8  
9  
10  
11  
12  
13  
14  
15  
16  
17  
18  
19  
20  
21  
22  
23  
24  
25  
26  
27  
28  
29  
30  
31  
32  
33  
34  
35  
36  
37  
38  
39  
40  
41  
42  
43  
44  
45  
46  
47  
48  
49  
50  
51  
52  
53  
54  
55  
56  
57  
58  
59  
60

For peer review only

**Table 1** The comparison of social functioning and family relations before and after entering MMT

|                                                          | Baseline<br>(admission to MMT) | Post-intervention period |                     |                     |
|----------------------------------------------------------|--------------------------------|--------------------------|---------------------|---------------------|
|                                                          |                                | 6 months                 | 12 months           | >12 months          |
| Arrested rate                                            | 13.1% (9.1%-18.5%)             | 3.4% (1.5%-7.7%)         | 4.3% (1.6%-11.4%)   | 1.4% (0.5%-3.7%)    |
| Proportion of selling drugs                              | 6.5% (3.4%-12.0%)              | 1.4% (0.5%-3.9%)         | 3.0% (1.0%-8.9%)    | 1.0% (0.1%-6.6%)    |
| Proportion of selling sex for drugs                      | 5.3% (2.4%-11.1%)              | 1.1% (0.5%-2.3%)         | 0.8% (0.3%-1.9%)    | 1.0% (0.1%-6.6%)    |
| Proportion of drug-related crime                         | 9.9% (6.8%-14.2%)              | 3.4% (2.5%-4.5%)         | 3.4% (0.8%-13.1%)   | 3.3% (2.1%-5.3%)    |
| Employment rate                                          | 26.1% (23.6%-28.8%)            | 47.3% (40.9%-53.8%)      | 54.7% (47.4%-61.9%) | 45.5% (37.2%-54.1%) |
| Had a good family relation                               | 39.7% (35.1%-44.6%)            | 63.3% (54.7%-71.1%)      | 72.1% (65.1%-78.2%) | 83.2% (77.8%-87.6%) |
| Having contact with former<br>drug-user friends everyday | 25.3% (18.9%-33.0%)            | 4.0% (2.4%-6.4%)         | 7.7% (1.4%-33.2%)   | 1.0% (0.1%-6.6%)    |

## REFERENCES

1. Zhuang X, Liang Y, Chow EP, *et al.* HIV and HCV prevalence among entrants to maintenance treatment clinics in China: a systematic review and meta-analysis. *BMC Infect Dis* 2012;12:130.
2. Zhuang X, Wang Y, Chow EP, *et al.* Risk factors associated with HIV/HCV infection among entrants in methadone maintenance treatment clinics in China: A systematic review and meta-analysis. *Drug Alcohol Depend* 2012;126:286-95.
3. Kulsudjarit K. Drug problem in southeast and southwest Asia. *Ann N Y Acad Sci* 2004;1025:446-57.
4. Qian HZ, Schumacher JE, Chen HT, *et al.* Injection drug use and HIV/AIDS in China: review of current situation, prevention and policy implications. *Harm Reduct J* 2006; 3:4.
5. Ball AL, Rana S, Dehne KL. HIV prevention among injecting drug users: responses in developing and transitional countries. *Public Health Rep* 1998;113:S170-S81.
6. Stimson GV. Has the United Kingdom averted an epidemic of HIV-1 among drug injectors? *Addiction* 1996;91:1085-89.
7. Ttrathdee SA, Vlahov D. The effectiveness of needle exchange programs: A review of the science and policy. *AIDScience* 2001;1:1-31.
8. Dole VP, Nyswander M. A medical treatment for diacetylmorphine (heroin) addiction. *JAMA* 1965;193:646.
9. Isbell H, Vogel VH. The addiction liability of methadone (amidone, dolophine, 10820) and its use in the treatment of the morphine abstinence syndrome. *Am J of psychiatry* 1949;105:909.
10. Parrino MW. State methadone treatment guidelines. US Department of Health and Human Services, Public Health Service, Substance Abuse and Mental Health Services Administration, Center for Substance Abuse Treatment. 1993.
11. Gambashidze N, Sikharulidze Z, Piralishvili G, *et al.* Evaluation of pilot methadone maintenance therapy in Georgia (Caucasus). *Georgian Med News* 2008;160:25.
12. Tran BX, Ohinmaa A, Duong AT, *et al.* Changes in drug use are associated with health-related quality of life improvements among methadone maintenance patients with HIV/AIDS. *Qual Life Res* 2012;21:613-23.
13. Ball JC, Ross A. *The effectiveness of methadone maintenance treatment: Patients, programs, services, and outcome.* New York: Springer-Verlag Publishing, 1991.
14. Dole VP, Joseph H. Long-term outcome of patients treated with methadone maintenance. *Ann N Y Acad Sci* 1978;311:181-96.
15. Gearing FR, Schweitzer MD. An epidemiologic evaluation of long-term methadone maintenance treatment for heroin addiction. *Am J Epidemiol* 1974; 100:101.
16. Appel PW, Joseph H, Kott A, *et al.* Selected in-treatment outcomes of long-term methadone maintenance treatment patients in New York State. *Mt Sinai J Med* 2001;68:55-61.
17. Bertschy G. Methadone maintenance treatment: an update. *Eur Arch Psychiatry Clin Neurosci* 1995;245:114-24.
18. Fiellin DA, O'Connor PG, Chawarski M, *et al.* Methadone maintenance in primary care: a randomized controlled trial. *JAMA* 2001;286:1724-31.
19. Hartel DM, Schoenbaum EE. Methadone treatment protects against HIV infection: two decades of experience in the Bronx, New York City. *Public Health Reports* 1998;113:107.
20. Hubbard RL, Craddock SG, Flynn PM, *et al.* Overview of 1-year follow-up outcomes in the drug abuse treatment outcome study (DATOS). *Psychol Addict Behav* 1997;11:261-78.

- 1
  - 2
  - 3
  - 4
  - 5
  - 6
  - 7
  - 8
  - 9
  - 10
  - 11
  - 12
  - 13
  - 14
  - 15
  - 16
  - 17
  - 18
  - 19
  - 20
  - 21
  - 22
  - 23
  - 24
  - 25
  - 26
  - 27
  - 28
  - 29
  - 30
  - 31
  - 32
  - 33
  - 34
  - 35
  - 36
  - 37
  - 38
  - 39
  - 40
  - 41
  - 42
  - 43
  - 44
  - 45
  - 46
  - 47
  - 48
  - 49
  - 50
  - 51
  - 52
  - 53
  - 54
  - 55
  - 56
  - 57
  - 58
  - 59
  - 60
21. Joseph H, Woods J. A point in time: the impact of expanded methadone maintenance treatment on citywide crime and public health in New York City 1971-1973. *Arch public health* 1995;53:215-31.
22. Joseph H, Stancliff S, Langrod J. Methadone maintenance treatment (MMT): a review of historical and clinical issues. *Mt Sinai J Med* 2000;67:347-64.
23. Michels II, Stover H, Gerlach R. Substitution treatment for opioid addicts in Germany. *Harm Reduct J* 2007;4:5.
24. Pang L, Hao Y, Mi GD, *et al.* Effectiveness of first eight methadone maintenance treatment clinics in China. *AIDS* 2007;21:S103-S07.
25. Ward J, Hall W, Mattick RP. Role of maintenance treatment in opioid dependence. *Lancet* 1999; 353:221-26.
26. Wu Z. *Landmark government methadone maintenance program in mainland China*. 15th International AIDS Conference. 2004.
27. Wu Z. *Methadone maintenance program in mainland China: from pilot to scale-up*. International Conference on the Reduction of Drug Related Harm. 20-24. 2005.
28. Musa R, Bakar AZA, Khan UA. Two-Year Outcomes of Methadone Maintenance Therapy at a Clinic in Malaysia. *Asia Pac J Public Health* 2012;24:826-32.
29. Keen J, Rowse G, Mathers N, *et al.* Can methadone maintenance for heroin-dependent patients retained in general practice reduce criminal conviction rates and time spent in prison? *Br J Gen Pract* 2000;50:48.
30. Moher D, Liberati A, Tetzlaff J, *et al.* Preferred reporting items for systematic reviews and meta-analyses: the PRISMA statement. *PLoS Med* 2009;6:e1000097.
31. Boyle MH. Guidelines for evaluating prevalence studies. *Evidence Based Mental Health* 1998;1:37-39.
32. Guo W, Qu SQ, Ding ZW, *et al.* Situations and trends of HIV and syphilis infections among drug users in China, 1995-2009. *Chin J Epidemiol* 2010;31:666-69.
33. Jia MH, Luo HB, Ma YL, *et al.* The HIV epidemic in Yunnan province, China, 1989-2007. *J Acqui Immune Defic Syndr* 2010;53:S34-S40.
34. Connock M, Juarez-Garcia A, Jowett S, *et al.* Methadone and buprenorphine for the management of opioid dependence: a systematic review and economic evaluation: Gray on behalf of the National Coordinating Centre for Health Technology Assessment. *Health Technol Assess* 2007;11:1-171, iii-iv.
35. Mutasa H. Risk factors associated with noncompliance with methadone substitution therapy (MST) and relapse among chronic opiate users in an Outer London community. *J Adv Nurs* 2001;35:97-107.
36. Padaiga Z, Subata E, Vanagas G. Outpatient methadone maintenance treatment program. Quality of life and health of opioid-dependent persons in Lithuania. *Medicina (Kaunas)* 2007; 43:235-41.
37. Ponizovsky AM, Grinshpoon A. Quality of life among heroin users on buprenorphine versus methadone maintenance. *Am J Drug Alcohol Abuse* 2007;33:631-42.
38. Marsch LA. The efficacy of methadone maintenance interventions in reducing illicit opiate use, HIV risk behavior and criminality: a meta-analysis. *Addiction* 1998;93:515-32.
39. Holloway KR, Bennett TH, Farrington DP. The effectiveness of drug treatment programs in reducing criminal behavior: a meta-analysis. *Psicothema* 2006;18:620-29.
40. Shi J, Zhao LY, Epstein DH, *et al.* The effect of methadone maintenance on illicit opioid use,

- human immunodeficiency virus and hepatitis C virus infection, health status, employment, and criminal activity among heroin abusers during 6 months of treatment in China. *J Addict Med* 2007;1:186.
41. Coviello DM, Zanis DA, Wesnoski SA, *et al.* An integrated drug counseling and employment intervention for methadone clients. *J Psychoactive Drugs* 2009;41:189-97.
  42. Blix O. Methadone maintenance programs in Sweden. *JAMA* 1989;261:2202.
  43. Pang L, Mi GD, Wang CH, *et al.* Evaluation of first 8 pilot methadone maintenance treatment clinics in China. *Chin J Exp Clin Virol* 2007;21:2-4.
  44. Chen B, Zhou BQ, Zhang HY, *et al.* Effective Evaluation of Methadone Maintenance Treatment Among Drug Users in Zhuhai. *Pract Prev Med* 2011;18:364-65.
  45. Chen GH, Yang HT, Qian XC, *et al.* Effectiveness evaluation of six month community-based methadone treatment in Jiangsu Province. *Chin J AIDS STD* 2008;14:590-93.
  46. Judd LL, Marston MG, Attkisson C, *et al.* Effective medical treatment of opiate addiction. National Consensus Development Panel on Effective Medical Treatment of Opiate Addiction. *JAMA* 1998;280:1936-43.
  47. Magura S, Nwakeze PC, Demsky SY. Pre- and in-treatment predictors of retention in methadone treatment using survival analysis. *Addiction* 1998;93:51-60.
  48. Cai WB, Li FZ, Dong X, *et al.* Efficacy evaluation of methadone maintenance therapy on drug users in Tenchong County, Yunnan Province. *Chin J for Clin* 2013;41:42-43.
  49. Chen W, Zhao LL, Ling L, *et al.* Effectiveness evaluation on initial methadone maintenance treatment at community clinics in Guangdong province. *Chin J Public Health* 2009;25:1416-18.
  50. Chen W, Ling L, He Q, *et al.* Performance evaluation and policy recommendations on community methadone maintenance treatment in Guangdong Province. *Chin J Health Policy* 2010;3:39-44.
  51. Duan YJ, Yin ZL, Xi CH, *et al.* Effect assessment of methadone maintenance treatment among heroin addicts in Ruili city. *Chin J AIDS STD* 2008;14:240-42.
  52. Fan LR, Fang WH. The effect of methadone maintenance treatment and social support intervention. *Chin J AIDS STD* 2012;18:424-24.
  53. Feng SQ, Zhou JB, Guo YL, *et al.* Effective evaluation of community-based methadone maintenance treatment for heroin addicts. *Chin J Public Health* 2010;26:924-25.
  54. Fu JH, Hong LY, Li ZJ, *et al.* Investigation of intervention effects on dropouts in high risk from methadone maintenance treatment. *Jiangxi Med J* 2010;45:932-34.
  55. Fu LP, Li F, Zhang ZZ, *et al.* Effective evaluation on parts of community-based methadone maintenance treatment clinics for heroin addicts in Xinjiang. *Endem Dis Bull* 2007; 22:17-19.
  56. Guo Y, Zhang XB. Analysis of methadone maintenance treatment of AIDS demonstration areas in Yunnan province. *Chin J AIDS STD* 2007;13:7-8,14.
  57. Han YB, Dong BQ, Li RJ, *et al.* Effective evaluation of methadone maintenance treatment for 6-month in heroin addicts. *J Appl Prev Med* 2012;18:70-74.
  58. Hu WS, Wang DP, Huang X, *et al.* Analysis of the efficacy of medicine(methadone) maintenance treatment in 125 cases of heroin dependence patients. *Chin J Drug Abuse Prev Treat* 2010;16:86-88.
  59. Huang YJ, Huang JG, Kai L, *et al.* An outcome assessment on methadone maintenance treatment in Youjiang district, Baise city. *J Youjiang Med Univ for Nat* 2012;34:461-63.
  60. Jiang A, Zhao JH, Wang XZ, *et al.* Effect analysis of the heroin addicts with methadone maintenance treatment in experimental units of Wuzhong in Ningxia. *Mod Prev Med* 2009;



- 36:2920-22.
61. Liu JB, DiLiXiaTi YHP, Li F, *et al.* The effective evaluation of the methadone maintenance treatment of heroin addicts. *Chin J Drug Abuse Prev Treat* 2007;13:10-13.
  62. Liu JK, Li LH, Chen YH, *et al.* Evaluation of Methadone Maintenance Treatment for Heroin Users in Panzhihua. *J Prev Med Inf* 2009;25:723-25.
  63. Liu WY, Wang S, Gong B, *et al.* Effective Evaluation of Methadone Maintenance Treatment Combined with Comprehensive Intervention for Six Months. *Acta Med Univ Scientiae et Technologiae Huazhong* 2012;41:190-94.
  64. Liu YJ, Deng PX, Xiong XY, *et al.* Effective evaluation on methadone maintenance treatment in Chaoyang district, Beijing. *Chin J Drug Depend* 2007;16:302-06.
  65. Long ZY, Wu ZY, Du B, *et al.* Situation of 538 heroin addicts undertaking methadone maintenance treatment. *Chin J Drug Depend* 2006;15:38-40.
  66. Lu JJ. Survey analysis on opiate addicts' Behaviors before and after Methadone maintenance treatment. *J Liaoning Med Univ* 2010;31:541-43.
  67. Qian YH. Effect of methadone maintenance therapy on drug users in Wuxi. *Occup and Health* 2008;24:450-52.
  68. Qu BW, Gao XX, Huang MJ, *et al.* Analysis of the efficacy of methadone maintenance therapy among heroin-addicts in Jiangmen Urban. *Mod Hosp* 2009;9:142-43.
  69. Tang XJ, Wang S, Gong B, *et al.* Evaluating the effect of comprehensive intervention on people treated with methadone maintenance for six months. *Chin Health Serv Manage* 2012;29:630-33.
  70. Tang RH, Duan S, Yang YC, *et al.* Analysis on social effects of methadone maintenance treatment in Dehong Prefecture, Yunnan Province. *Chin J Dis Control Prev* 2012;16:1044-48.
  71. Tang XY, Hou SQ, Tang JH. Hunan Beihu methadone maintenance treatment in socio-economic evaluation. *Chin J Drug Depend* 2008;17:380-82.
  72. Tang YX, Shao ZM, Liang ZM, *et al.* Effective Evaluation of Methadone Maintenance Treatment among 120 drug abusers in Chancheng District. *Guangdong Med J* 2013;34:3447-49.
  73. Wang YZ, Sun J. Analysis of the efficacy of methadone maintenance treatment in 237 cases of heroin dependence patients. *Prac J Med Pharm* 2008;25:1304-06.
  74. Wei XL, Li HX, Ma CF, *et al.* Effective evaluation of methadone maintenance treatment for heroin dependent patients in Xi'an city. *Chin J Drug Depend* 2008;17:197-200.
  75. Xue LY, Xu CL, Pan QC, *et al.* Evaluation of the therapeutic effect of methadone maintenance in 115 cases of heroin addicts. *Chin J Drug Abuse Prev Treat* 2006;12:255-57.
  76. Yun Y, Zhou DS, Yang J. 338 cases of opium addicts insist on methadone maintenance treatment effect analysis. *Chin J Drug Abuse Prev Treat* 2014;20:262-66.
  77. Zhang HF, Deng KW, Zhang YF, *et al.* Efficacy evaluation on methadone maintenance treatment in Hanzhou Shaanxi. *Chin J Drug Depend* 2009; 18:43-46.
  78. Zhang HY. Study on the effect and impact factors of methadone maintenance treatment in Dongcheng district, Beijing. *Cap J Public Health* 2013;7:54-57.
  79. Zhang J, Xu YK, Li LM, *et al.* Evaluation of the effect of methadone maintenance treatment among heroin addicts. *Chin J Abuse Prev Treat* 2008;14:318-20.
  80. Zhao YT, Xu HF, Fan LR. Evaluation for the Community-Based Methadone Maintenance Treatment in Guangzhou City. *J Trop Med* 2009;9:329-31.
  81. Zheng WX, Chen K. Evaluation for the methadone maintenance treatment in Fujian Province. *Strait J Prev Med* 2012;18:72-74.

- 1  
2  
3 82. Zhu YH, Wang X, Huang M. Evaluation of Effect of Community-based Methadone Maintenance  
4 Treatment for Addicts. J Jiujiang Univ 2012;27:25-28.  
5  
6  
7  
8  
9  
10  
11  
12  
13  
14  
15  
16  
17  
18  
19  
20  
21  
22  
23  
24  
25  
26  
27  
28  
29  
30  
31  
32  
33  
34  
35  
36  
37  
38  
39  
40  
41  
42  
43  
44  
45  
46  
47  
48  
49  
50  
51  
52  
53  
54  
55  
56  
57  
58  
59  
60

For peer review only

1  
2  
3 **Methadone maintenance treatment programme reduces criminal activities and**  
4 **improve social wellbeing of drug users in China: a systematic review and**  
5 **meta-analysis**  
6  
7

8  
9 Hua-Min Sun<sup>1\*</sup>

10 Email: huamin2380@163.com

11 Xiao-Yan Li<sup>1\*</sup>

12 Email: sqzr357@126.com

13 Eric PF Chow<sup>2,3,4</sup>

14 Email: echow@mshc.org.au

15 Tong Li<sup>1</sup>

16 Email: Jin0925@126.com

17 Yun Xian<sup>1</sup>

18 Email: xianyun61@126.com

19 Yi-Hua Lu<sup>1</sup>

20 Email: 23291828@qq.com

21 Tian Tian<sup>1</sup>

22 Email: ttypes\_01@163.com

23 Xun Zhuang<sup>1†</sup>

24 Email: ntzhuang@163.com

25 Lei Zhang<sup>1,2†</sup>

26 Email: lzhang@kirby.unsw.edu.au

27  
28  
29 **Word count: 2,770**

30  
31  
32  
33 <sup>1</sup> Department of Epidemiology and Biostatistics, School of Public Health, Nantong University, Jiangsu  
34 226019, China

35 <sup>2</sup> The Kirby Institute, University of New South Wales, Sydney, NSW, Australia

36 <sup>3</sup> Melbourne Sexual Health Centre, Alfred Health, Melbourne, Victoria, Australia

37 <sup>4</sup> Central Clinical School, Faculty of Medicine, Nursing and Health Sciences, Monash University,  
38 Melbourne, Victoria, Australia

39  
40  
41  
42  
43  
44  
45 \*HMS and XYL are joint first authors.

46  
47 † LZ (lzhang@kirby.unsw.edu.au) and XZ (ntzhuang@163.com) are joint corresponding authors.

48 Correspondence: Department of Epidemiology and Biostatistics, School of Public Health, Nantong  
49 University. Nantong 226019, Jiangsu, China. Phone (Fax): +86-513-85012902; The Kirby Institute,  
50 University of New South Wales, Sydney, NSW, Australia. Phone: +612 9385 0869 Fax: +612 9385  
51 0920.  
52  
53  
54  
55  
56  
57  
58  
59  
60

## ABSTRACT

**Objective:** Methadone maintenance treatment (MMT) has been implemented in China since 2004 and has expanded into a nationwide program. The study aims to evaluate the changes in social functioning, family relations and drug-related criminal behaviours among MMT clients in China.

**Design:** Systematic review and meta-analysis.

**Methods:** Both English and Chinese literature databases, including PubMed, Chongqing VIP Chinese Science and Technology Journals Database (CQVIP), China National Knowledge Infrastructure (CNKI) and Wanfang Data, were comprehensively searched over the period 2004-2014 for studied indicators. Study selection, quality assessment and data extraction were conducted according to Preferred Reporting Items for Systematic Reviews and Meta-Analyses. Meta-analyses were conducted using Comprehensive Meta-Analysis Biostat software.

**Results:** Thirty-eight articles were included in this review (1 in English and 37 in Chinese). The self-reported arrest rate reduced from 13.7% (95% CI: 9.1-20.0%) at baseline, to 3.5% (1.1-10.5%), and to 4.3% (1.6-11.4%) after 6, and 12-month MMT intervention, respectively. The rate for drug-selling reduced from 7.6% (3.8-14.8%) at baseline, to 1.9% (0.6-6.2%), and to 3.0% (1.0-8.9%) after 6, and 12-month of intervention, respectively. Similarly, the rates of selling sex for drugs and drug-related crime reduced from 5.3% (2.4%-11.1%) and 9.9% (6.8%-14.2%) at baseline, to 1.1% (0.5%-2.3%) and 3.4% (2.5%-4.5%) at 6-month, then to 0.8% (0.3%-1.9%) and 3.4% (0.8%-13.1%) at 12-month after treatment initiation, respectively. In contrast, employment rate of clients and proportion of clients having a good relationship with family increased substantially from 26.4% (22.9-30.1%) and 37.9% (32.0-44.2%), to 41.6% (36.6-48.0%) and 59.6% (48.1-70.2%) at 6-month, then to 59.8% (52.4-66.8%) and 75.0% (69.0-80.2%) at 12-month after treatment initiation.

**Conclusions:** MMT has significantly reduced the criminal activities and improved employment rate and social wellbeing of MMT clients. MMT is an effective measure to help drug users to resume societal and familial functions in China.

## KEY WORDS

Criminal activities, Social functioning and family relations, Changes, Methadone maintenance treatment, Meta-analysis, China

## Strengths and limitations of this study

- This is the **first study to review** how MMT intervention could influence the changes of social functioning and family relations among drug users in MMT clinics in China.
- This study evaluated the changes in drug-related criminal behaviours, improvements in social functioning and family relations among drug users before and after entering the MMT interventions through a meta-analysis of published literature since 2004 in China.
- **The number of studies is limited and may lead to issues on representativeness of the large drug user population in China.**

## INTRODUCTION

Illicit drug abuse is a social and public health issue internationally. It not only increases the risks of disease transmission such as HIV and hepatitis C virus (HCV),<sup>1 2</sup> but also enhances drug-related criminal activities, family issues, and excessive health care expenditures.<sup>3 4</sup> Heroin is the most common drug used among drug users in both developed and developing countries.<sup>5-7</sup> Methadone maintenance treatment (MMT) has been found to be an effective harm reduction program for drug users.<sup>8-10</sup> Methadone is a safe, low-cost and convenient generic drug for treatment of opioid dependence.<sup>11 12</sup> It effectively reduced drug-related mortality<sup>13-15</sup> drug-related crimes and help drug users to resume social and familial functions.<sup>16-25</sup>

In 2004, eight out-patient MMT clinics were established in China<sup>26 27</sup> and lately expanded into a nationwide program encompassing more than 756 MMT clinics in China, covering 28 Chinese provinces by 2012. It has been shown that the pilot of these eight MMT clinics has significantly improved the social functioning among MMT clients. Annual employment rate were reportedly increased from 22.9% to 40.6% ( $P < 0.01$ , compared with the baseline survey); and the proportion of clients having a harmonious relationship with families increased from 49.6% to 65.8% ( $P < 0.01$ ) after receiving the MMT programs for 12 months. Self-reported criminal behaviour of clients has also reduced from 20.7% to 3.8% ( $P < 0.01$ ).<sup>24</sup> Similar benefits of MMT were also reported in other countries. For instance, the employment rate of MMT clients Malaysia increased from 70.1% to 77.6% after two years of treatment.<sup>28</sup> A retrospective study in UK also showed that the total number of convictions, theft and fraud convictions, weeks spent in prison per year were reduced by 39.3% ( $P = 0.03$ ), 52.17% ( $P < 0.001$ ), 82.8% ( $P = 0.002$ ), respectively.<sup>29</sup>

Numerous studies have reported improvements in social and family wellbeing among MMT clients in China, but a systematic review that synthesises all these impacts remained absent. This study aims to evaluate the changes in drug-related criminal behaviours, improvements in social functioning and family relations among drug users before and after entering the MMT interventions through a meta-analysis of published literature since 2004 in China.

## METHODS

### Data sources

We conducted a systematic review of published peer-reviewed research articles by searching the following databases: PubMed, CQVIP, CNKI and Wanfang Data from January 2004 to October 2014. Keywords used in the database search included (“Methadone” OR “Methadone Maintenance Treatment” OR “Methadone Maintenance Therapy” OR “Methadone Maintenance” OR “MMT”) AND (“Crime” OR “Criminal rates” OR “Employment” OR “Family relationship” OR “Social functions”) AND (“China” OR “China Mainland” OR “Chinese”). We also performed a manual search on the reference lists of published articles. This review was reported according to the PRISMA (Preferred Reporting Items for Systematic Reviews and Meta-Analyses) Statement issued in 2009.<sup>30</sup>

### Inclusion/exclusion criteria

Studies were eligible for inclusion in this systematic review if they met the following criteria: (1) articles published in Chinese or English language; (2) study reported social functioning or family relations among clients in MMT at baseline and follow-up; and (3) reported the study characteristics such as study location, investigation period, duration of intervention, and sample size. Pre-and-post intervention studies among MMT clients were also included. Exclusion criteria were: (1) review papers; (2) non peer-reviewed local/government reports; (3) conference abstracts and presentations; and (4) dissertations. If the same data source were published in both English and Chinese sources, the articles published in Chinese language were excluded from this study.

### Study selection

Selected studies were evaluated by two independent investigators (HMS, XYL) according to the inclusion and exclusion criteria. Disagreement in evaluation was resolved by discussion among the investigators. If the same study data were published in both English and Chinese sources, the articles published in Chinese language were excluded from this study. In cases where multiple studies were found to use the same data source, we selected the first published study for inclusion in the meta-analysis.

### Quality assessment

1  
2  
3 **Two independent investigators** used a validated quality assessment tool for observational studies<sup>31</sup> to  
4 assess the quality of studies. The following eight items were assessed to calculate a total quality score:  
5  
6 (1) clear definition of the target population; (2) representativeness of probability sampling; (3) sample  
7 characteristics matching the overall population; (4) adequate response rate; (5) method of data  
8 collection methods; (6) reliability of survey measures/instruments; (7) validity of survey  
9 measures/instruments; and (8) appropriate statistical methods. Each item was scored 0 for 'No' and 1  
10 for 'Yes', respectively. The total quality score ranged from 0 to 8 (Table S1).  
11  
12  
13  
14  
15

#### 16 **Data abstraction**

17 **Two independent investigators** extracted the following information from all eligible studies: first author,  
18 year of publication, study location, investigation period, gender composition, age, sample size, duration  
19 of intervention, proportion of drug-related criminal activities (including drug-trafficking, selling,  
20 robbery and theft for drug), employment rate, and relationship with family among clients in MMT at  
21 baseline and follow-up of treatment.  
22  
23  
24  
25  
26  
27

#### 28 **Statistical Analysis**

29 Meta-analyses were carried out with the Comprehensive Meta-Analysis software (V2.0, Biostat,  
30 Englewood, New Jersey). The effect rates of pooled estimates and 95% confidence intervals (CIs) were  
31 determined based on random effect models. Heterogeneity tests were performed using the Cochran  
32 Q-test ( $P < 0.10$  represents statistically significant heterogeneity) and  $I^2$  statistic. Potential publication  
33 bias was measured by the Begg and Mazumdar rank correlation ( $P < 0.05$  represents statistically  
34 significant publication bias).  
35  
36  
37  
38  
39  
40  
41  
42  
43  
44  
45  
46  
47  
48  
49  
50  
51  
52  
53  
54  
55  
56  
57  
58  
59  
60



## RESULTS

### Trial Flow/Flow of included studies

According to our initial search strategies, 345 articles were identified from four electronic databases. We excluded 128 irrelevant articles after the title screening. The remaining 217 abstracts were screened by two independent investigators (HMS, XYL), and 136 articles were excluded. 81 articles were eligible for full-text screening, of these, 43 articles were excluded. A total of 38 articles were eligible and included (1 in English, 37 in Chinese) in this review. 22 studies reported the changes in criminal activities (14 reported arrested rate, 8 reported drug-sold, 7 reported selling sex for drugs and 12 reported rate for drug-related crime), and 37 studies reported the changes in family and friends relations (37 reported employment, 28 reported relationship with family, 11 reported relationship with friends) (Figure 1).

### Study characteristics

The sample size of MMT clients reported in the eligible studies ranged from 65 to 13,310 (median: 320.5, IQR:120-651.5). A total of 30,239 participants were included in this review, and about 76.2% were male. The mean age of the total MMT clients was 34.42 years (range: 18-62 years). Of the 38 eligible articles, almost half of the studies (44.8%) were conducted in the provinces with high HIV prevalence (>20%)<sup>32 33</sup> including Yunnan, Sichuan, Guangdong, Xinjiang, Guizhou and Guangxi. The follow-up period of MMT intervention ranged from 6 to 48 months, and the majority were followed up within 12 months (86.8%). Twenty studies were prospective cohort studies, whereas others were retrospective.

### Criminal activities

The criminal activities among the MMT clients had significantly reduced after receiving MMT intervention. The self-reported arrest rate reduced from 13.7% (95% CI: 9.1-20.0%) at baseline (Table 1, Figure 2A), to 3.5% (95% CI: 1.1-10.5%), to 4.3% (95% CI: 1.6-11.4%) and to 1.4% (95% CI: 0.5-3.7%) at 6-, 12- and 36-months follow-up. About 7.6% (95% CI: 3.8-14.8%) of the clients who had sold drugs before receiving MMT intervention (Table 1, Figure 2B), this rate was reduced to 1.9% (95% CI: 0.6-6.2%) after 6 months, to 3.0% (95% CI: 1.0-8.9%) after 12 months and 1.0% (95% CI: 0.1-6.6%) after 36 months. The proportion of selling sex for drugs reduced from 5.3% (2.4%-11.1%) at baseline, to 1.1% (0.5%-2.3%) at 6-month, to 0.8% (0.3%-1.9%) at 12-month intervention, respectively (Table 1,

1  
2  
3 Figure 2C). The proportion of drug-related crime also reduced from 9.9% (6.8%-14.2%) at baseline, to  
4 3.4% (2.5%-4.5%) at 6-month, to 3.4% (0.8%-13.1%) at 12-month intervention, respectively (Table 1,  
5 Figure 2D). 10 studies reported the rate of drug-related crime decreased from 1.1-30.34% to 0.5-3.7%.  
6  
7 In addition, 6 studies reported the rate of selling sex for drugs reduced from 1.9-24.0% to 0.5-1.5%  
8 after MMT intervention.  
9  
10

### 11 12 13 **Social functioning**

14 Employment rate among clients had been improved after receiving MMT. The overall employment rate  
15 increased from 26.4% (95% CI: 22.9-30.1%) at baseline (Table 1, Figure 2E), to 41.6% (95% CI:  
16 36.6-48.0%) after 6 months of treatment, and further increased to 59.8% (95% CI: 52.4-66.8%) after 12  
17 months, but slightly decreased to 55.4% (95% CI: 48.2-62.3%) over 12 months.  
18  
19  
20  
21

### 22 23 **Family relations**

24 Family relations among clients had also been improved after receiving MMT. In addition, only 37.9%  
25 (95% CI: 32.0-44.2%) (Table 1, Figure 2F) drug users reporting having a good relationship with their  
26 family before receiving MMT interventions; however, this rate significantly increased to 59.6% (95% CI:  
27 48.1-70.2%) after 6 months, to 75.0% (95% CI: 69.0-80.2%) after 12 months, and to 83.2% (95% CI:  
28 77.8-87.6%) after >12 months of treatment.  
29  
30  
31  
32  
33

### 34 35 **Contacting with former drug-user friends**

36 Furthermore, about 31.0% of clients (95% CI: 25.7-36.8%) (Table 1, Figure 2G) met their former  
37 drug-user friends every day at baseline; however, the rate of contacting with former drug-user friends  
38 reduced to 6.5% (95% CI: 4.4-9.4%), 7.7% (95% CI: 1.4-33.2%), 1.0% (95% CI: 0.1-6.6%) after 6,  
39 12, >12 months of intervention, respectively.  
40  
41  
42  
43  
44

### 45 46 **Quality assessment**

47 All studies reported study period, study location and sample size. All studies reached a total quality  
48 score of three or higher (out of a total of eight). The mean quality score was 3.97, indicating a  
49 reasonably good quality of our selected studies (Table S1).  
50  
51  
52  
53  
54  
55  
56  
57  
58  
59  
60

## DISCUSSION

To our best knowledge, this is the first study that reviews the impacts of MMT treatment on the changes in criminal activities, social functioning and family relations among MMT clients in China. Our findings indicated that MMT have significantly reduced self-reported arrest rate, frequencies of selling drugs, drug-related crime activities, selling sex for drugs and likelihood of meeting former drug-user friends. In contrast, it improved employment rate and family relations of MMT clients. These findings are consistent with other international studies in England, Lithuania and Israel.<sup>34-37</sup> In particular, a meta-analysis conducted by Marsch et.al. showed that 85% of drug users who attended MMT have reduced drug-related crime.<sup>38</sup> A systematic review conducted by Holloway et.al., also showed that MMT clients have less criminal behaviour than the non-MMT drug users.<sup>39</sup> Despite these, policy makers who retain strong moral reservations about MMT would emphasise the physically dependent nature of methadone and ongoing spending of public funds on a population that is deemed as 'social evils' in many settings.<sup>40</sup> Further studies are necessary to evaluate other aspects of MMT, including structural barriers and cost-effectiveness of the program, in order to help policy makers to inform relevant polices in the future.

We demonstrated improved employment rates and family relations among MMT clients in China. Consistently, a study conducted in the United States also indicated a significant improvement in employment outcomes with an integrated drug counselling and employment programme for MMT clients.<sup>41</sup> In addition, a Swedish study showed that over 80% severe heroin addicts received new jobs and re-integrated into the society after receiving MMT.<sup>42</sup> In a separate study, Blix followed 345 heroin users for 24 years over the period 1966-1989 in Sweden. In which, a 70-80% employment rate among MMT clients was reported.<sup>42</sup> Interestingly, our meta-analysis indicated the best employment outcome at 12-month of treatment initiation and the rate started to decline when treatment continues beyond 12 months. This finding is echoed with findings from an early survey of first eight pilot MMT clinics in China.<sup>43</sup> A plausible explanation may be that employed clients are more likely to drop-out of treatment, which leads to a declining employment rate among those who sustain treatment. Further, family relations of clients improved during the course of MMT. With reduced symptoms of addiction, clients would be able to resume family duties and re-establish relationship with their family members.<sup>44 45</sup>

Several limitations in this study should be noted. First, by the end of 2012, there were totally 756 MMT clinics in China, covering 28 Chinese provinces, however, out of which, 13 provinces did not

1  
2  
3 publish any reports on the related characteristics of social and familial relationship and this limits our  
4 analysis in these regions. Second, only eight studies reported clients **who sold drugs**. Small number of  
5 studies could lead to information bias in our study. Third, due to the small number of available studies,  
6 we pooled all study estimate beyond 12 months of follow-up in this analysis. Fourth, substantial  
7 heterogeneity existed between studies due to different study methodologies, method of recruitment and  
8 sampling sizes in different studies. Our meta-analyses could not take all of these variations across  
9 individual studies into account. Fifth, limited number of studies reported relevant characteristics of social  
10 and familial relationship in recent years and the reports' delay in publication may also bias our findings.  
11  
12  
13  
14  
15  
16  
17

### 18 **Conclusions**

19  
20 **Conclusively, MMT programme in China has been shown to be effective in reducing criminal activities**  
21 **and improving employment outcome and social wellbeing of its clients. MMT programme should not**  
22 **only focus on the reduction of drug abuse, other advisory and intervention services, such as Voluntary**  
23 **Counselling and Testing (VCT) of HIV, psychological therapy, family intervention may be integrated**  
24 **into the program simultaneously.<sup>46 47</sup> In parallel, clients should be encouraged to make use of**  
25 **rehabilitation facilities to improve their own awareness in safeguarding their own rights and interests.**  
26 **MMT may serve as a valuable opportunity to reduce drug-related harm among drug users and enable**  
27 **them to return to society as healthy and productive individuals.**  
28  
29  
30  
31  
32  
33  
34  
35  
36  
37  
38  
39  
40  
41  
42  
43  
44  
45  
46  
47  
48  
49  
50  
51  
52  
53  
54  
55  
56  
57  
58  
59  
60

1  
2  
3 **Ethics** An ethics statement was not required for this work.  
4

5 **Acknowledgments** The authors thank all the participants and staff in the study. Additional thanks  
6  
7 Yan-xian Liang and Ya-fei Wang (Department of Epidemiology and Health Statistic, School of Public  
8  
9 Health, Nantong University) for data analysis.  
10

11 **Contributors** EPFC, LZ and XZ designed the study. HMS and XYL performed the data collection  
12  
13 and provided the first draft of manuscript. TL, XY, YHL and TT performed data analysis. LZ and EPFC  
14  
15 assisted with data interpretation. EPFC, LZ and XZ provided critical revision for important intellectual  
16  
17 content. All authors read and approved the final version of manuscript.  
18

19 **Funding** This work was supported by grants from Round 8 of the Australian Leadership Awards  
20  
21 (ALA) Fellowships Program and Overseas Scholarship of Jiangsu Government, China and the National  
22  
23 Natural Science Foundation of China (81373060).  
24

25 **Competing interests** None.  
26  
27  
28  
29  
30  
31  
32  
33  
34  
35  
36  
37  
38  
39  
40  
41  
42  
43  
44  
45  
46  
47  
48  
49  
50  
51  
52  
53  
54  
55  
56  
57  
58  
59  
60

**Table 1** The comparison of social functioning and family relations before and after entering MMT

|                                                          | Baseline<br>(admission to MMT) | Post-intervention period |                     |                     |
|----------------------------------------------------------|--------------------------------|--------------------------|---------------------|---------------------|
|                                                          |                                | 6 months                 | 12 months           | >12 months          |
| Arrested rate                                            | 13.1% (9.1%-18.5%)             | 3.4% (1.5%-7.7%)         | 4.3% (1.6%-11.4%)   | 1.4% (0.5%-3.7%)    |
| Proportion of selling drugs                              | 6.5% (3.4%-12.0%)              | 1.4% (0.5%-3.9%)         | 3.0% (1.0%-8.9%)    | 1.0% (0.1-6.6%)     |
| Proportion of selling sex for drugs                      | 5.3% (2.4%-11.1%)              | 1.1% (0.5%-2.3%)         | 0.8% (0.3%-1.9%)    | 1.0% (0.1%-6.6%)    |
| Proportion of drug-related crime                         | 9.9% (6.8%-14.2%)              | 3.4% (2.5%-4.5%)         | 3.4% (0.8%-13.1%)   | 3.3% (2.1%-5.3%)    |
| Employment rate                                          | 26.1% (23.6%-28.8%)            | 47.3% (40.9%-53.8%)      | 54.7% (47.4%-61.9%) | 45.5% (37.2%-54.1%) |
| Had a good family relation                               | 39.7% (35.1%-44.6%)            | 63.3% (54.7%-71.1%)      | 72.1% (65.1%-78.2%) | 83.2% (77.8%-87.6%) |
| Having contact with former<br>drug-user friends everyday | 25.3% (18.9%-33.0%)            | 4.0% (2.4%-6.4%)         | 7.7% (1.4%-33.2%)   | 1.0% (0.1%-6.6%)    |

**Table S1** Studies reporting the changes in criminal activities, social wellbeing and family relations before and after entering MMT

## Change of social functioning and family relations

| First Author,<br>Published Year | Study<br>Period | Study<br>Location<br>(Province) | Sample<br>size | Post-intervention<br>period<br>(month) | Arrested rate         | Selling drugs       | Selling sex<br>for drugs | Drug-related<br>criminal     | Employment<br>status         | Good<br>relationship<br>with family | Contacting<br>with<br>former<br>drug-user<br>friends<br>everyday | Quality<br>Assessment<br>Score |
|---------------------------------|-----------------|---------------------------------|----------------|----------------------------------------|-----------------------|---------------------|--------------------------|------------------------------|------------------------------|-------------------------------------|------------------------------------------------------------------|--------------------------------|
| Cai WB (2013) <sup>48</sup>     | 2013            | Yunnan                          | 365            | 6                                      |                       |                     |                          |                              |                              | B:117/239<br>A:178/234              |                                                                  | 3                              |
| Chen B (2011) <sup>44</sup>     | 2009            | Guangdong                       | 102            | 36                                     | B:8/102<br>A:1/102    | B:10/102<br>A:1/102 | B:4/102<br>A:1/102       | B:5/102<br>A:1/102           |                              | B:61/102<br>A:84/102                | B:5/102<br>A:1/102                                               | 4                              |
| Chen GH (2008) <sup>45</sup>    | 2006            | Jiangsu                         | 554            | 6                                      |                       |                     | B:54/554<br>A:2/324      | B:12/554<br>A:12/324         | B:159/554<br>A:137/324       | B:266/554<br>A:244/324              |                                                                  | 3                              |
| Chen W (2009) <sup>49</sup>     | 2008            | Guangdong                       | 445            | 12                                     |                       |                     |                          | B:135/445<br>A:7/445         | B:164/445<br>A:243/445       |                                     |                                                                  | 5                              |
| Chen W (2010) <sup>50</sup>     | 2008            | Guangdong                       | 13310          | 6                                      |                       |                     |                          | B:719/13310<br>A:426/13310   | B:3128/13310<br>A:7467/13310 |                                     |                                                                  | 4                              |
| Chen W (2010) <sup>50</sup>     | 2008            | Guangdong                       | 13310          | 12                                     |                       |                     |                          | B: 719/13310<br>A: 452/13310 | B:3128/13310<br>A:7334/13310 |                                     |                                                                  | 4                              |
| Duan YJ (2008) <sup>51</sup>    | 2006            | Yunnan                          | 99             | 12                                     |                       |                     |                          |                              | B:28/99<br>A:90/99           | B:53/99<br>A:77/99                  |                                                                  | 3                              |
| Fan LR (2012) <sup>52</sup>     | 2010            | Jiangxi                         | 124            | 12                                     |                       |                     |                          |                              | B:9/67<br>A:51/124           | B:51/124<br>A:87/124                |                                                                  | 3                              |
| Feng SQ (2010) <sup>53</sup>    | 2008            | Jiangsu                         | 371            | 12                                     | B:12/371<br>A:10/371  |                     | B:7/371<br>A:2/371       | B:4/371<br>A:2/371           |                              |                                     |                                                                  | 4                              |
| Fu JH (2010) <sup>54</sup>      | 2008            | Jiangxi                         | 80             | 6                                      |                       |                     |                          |                              |                              | B:22/80<br>A:19/68                  |                                                                  | 4                              |
| Fu LP (2007) <sup>55</sup>      | 2006            | Xinjiang                        | 958            | 6                                      | B:116/593<br>A:28/135 | B:77/593<br>A:8/135 | B:25/593<br>A:2/135      | B:69/593<br>A:8/135          | B:292/593<br>A:68/134        | B:241/599<br>A:87/134               | B:244/583<br>A:16/133                                            | 3                              |
| Fu LP (2007) <sup>55</sup>      | 2006            | Xinjiang                        | 958            | 12                                     |                       |                     | B:25/593<br>A:2/197      | B:69/593<br>A:4/197          | B:292/593<br>A:143/225       | B:241/599<br>A:182/231              | B:244/583<br>A:37/230                                            | 3                              |
| Guo Y (2007) <sup>56</sup>      | 2006            | Yunnan                          | 656            | 6                                      |                       |                     |                          | B:79/656<br>A:5 /233         | B:183/656<br>A:85 /233       | B:238/656<br>A:135/233              | B:201/656<br>A:13/233                                            | 5                              |

**Table S1** Studies reporting the changes in criminal activities, social wellbeing and family relations before and after entering MMT (*Continued*)

## Change of social functioning and family relations

| First Author,<br>Published Year | Study<br>Period | Study<br>Location<br>(Province) | Sample<br>size | Post-intervention<br>period<br>(month) | Change of social functioning and family relations |                     |                          |                          |                        |                                     |                                                               | Quality<br>Assessment<br>Score |   |
|---------------------------------|-----------------|---------------------------------|----------------|----------------------------------------|---------------------------------------------------|---------------------|--------------------------|--------------------------|------------------------|-------------------------------------|---------------------------------------------------------------|--------------------------------|---|
|                                 |                 |                                 |                |                                        | Arrested rate                                     | Selling drugs       | Selling sex<br>for drugs | Drug-related<br>criminal | Employment<br>status   | Good<br>relationship<br>with family | Contacting<br>with former<br>drug-user<br>friends<br>everyday |                                |   |
| Han YB (2012) <sup>57</sup>     | 2009            | Guangxi                         | 1123           | 6                                      |                                                   |                     |                          |                          |                        | B:303/658<br>A:340/658              |                                                               | 4                              |   |
| Hu WS (2010) <sup>58</sup>      | 2008            | Guangdong                       | 125            | 22                                     |                                                   |                     |                          |                          |                        | B:12/125<br>A:65/125                | B:18/125<br>A:105/125                                         |                                | 4 |
| Huang YJ(2012) <sup>59</sup>    | 2010            | Guangxi                         | 150            | 6                                      | B:31/150<br>A:5/150                               | B:21/150<br>A:3/150 | B:9/150<br>A:2/150       | B:46/150<br>A:8/150      | B:39/150<br>A:98/150   | B:78/150<br>A:116/150               | B:63/150<br>A:8/150                                           |                                | 5 |
| Jiang A (2009) <sup>60</sup>    | 2007            | Ningxia                         | 100            | 12                                     | B:32/100<br>A:11/100                              | B:18/100<br>A:3/100 | B:24/100<br>A:1/100      |                          | B:38/100<br>A:50/100   | B:46/100<br>A:82/100                | B:32/100<br>A:3/100                                           |                                | 4 |
| Liu JB (2007) <sup>61</sup>     | 2005            | Xinjiang                        | 170            | 6                                      |                                                   |                     |                          |                          | B:31/94<br>A:45/94     | B:32/94<br>A:49/94                  |                                                               |                                | 4 |
| Liu JK (2009) <sup>62</sup>     | 2006            | Sichuan                         | 112            | 12                                     |                                                   |                     |                          |                          | B:32/112<br>A:102/112  | B:60/112<br>F86/112                 |                                                               |                                | 3 |
| Liu WY(2012) <sup>63</sup>      | 2010            | Chongqing                       | 650            | 6                                      |                                                   | B:1/640<br>A:1/645  |                          |                          | B:184/605<br>A:536/648 | B:318/639<br>A:508/643              | B:84/637<br>A:1/640                                           |                                | 3 |
| Liu YJ (2007) <sup>64</sup>     | 2007            | Beijing                         | 130            | 6                                      | B:9/130<br>A:1/130                                | B:6/130<br>A:3/130  |                          |                          | B:30/130<br>A:33/130   | B:108/130<br>A:98/130               | B:36/130<br>A:3/130                                           |                                | 3 |
| Long ZY (2006) <sup>65</sup>    | 2005            | Guizhou                         | 538            | 6                                      |                                                   |                     |                          |                          | B:134/538<br>A:104/404 |                                     |                                                               |                                | 4 |
| Lu JJ (2010) <sup>66</sup>      | 2010            | Jiangsu                         | 185            | 36                                     | B:8/185<br>A:3/185                                |                     |                          |                          | B:75/185<br>A:95/185   |                                     |                                                               |                                | 5 |
| Pang L (2007) <sup>24</sup>     | 2004            | Beijing                         | 609            | 6                                      |                                                   |                     |                          | B:121/585<br>A:22/609    | B:134/585<br>A:263/609 |                                     |                                                               |                                | 5 |
| Pang L (2007) <sup>24</sup>     | 2004            | Beijing                         | 468            | 12                                     |                                                   |                     |                          | B:121/585<br>A:178/468   | B:134/585<br>A:190/468 | B:200/585<br>A:308/468              |                                                               |                                | 5 |
| Qian YH (2008) <sup>67</sup>    | 2007            | Jiangsu                         | 965            | 6                                      |                                                   |                     |                          |                          | B:25/103<br>A:45/104   | B:55/103<br>A:79/104                |                                                               |                                | 4 |



**Table S1** Studies reporting the changes in criminal activities, social wellbeing and family relations before and after entering MMT (*Continued*)

## Change of social functioning and family relations

| First Author,<br>Published Year | Study<br>Period | Study<br>Location<br>(Province) | Sample<br>size | Post-intervention<br>period<br>(month) | Change of social functioning and family relations |                     |                          |                          |                          |                                     | Quality<br>Assessment<br>Score |                                                               |
|---------------------------------|-----------------|---------------------------------|----------------|----------------------------------------|---------------------------------------------------|---------------------|--------------------------|--------------------------|--------------------------|-------------------------------------|--------------------------------|---------------------------------------------------------------|
|                                 |                 |                                 |                |                                        | Arrested rate                                     | Selling drugs       | Selling sex<br>for drugs | Drug-related<br>criminal | Drug-related<br>criminal | Good<br>relationship<br>with family |                                | Contacting<br>with former<br>drug-user<br>friends<br>everyday |
| Qu BW (2009) <sup>68</sup>      | 2007            | Guangdong                       | 80             | 6                                      |                                                   |                     | B:7/80<br>A:1/80         | B:3/80<br>A:1/80         | B:3/80<br>A:1/80         | B:26/80<br>A:39/80                  |                                | 6                                                             |
| Tang XJ (2012) <sup>69</sup>    | 2010            | Chongqing                       | 1477           | 6                                      |                                                   |                     |                          |                          |                          | B:737/1458<br>A:864/1082            | B:222/1456<br>A:2/1066         | 3                                                             |
| Tang RH (2012) <sup>70</sup>    | 2011            | Yunnan                          | 382            | 6                                      |                                                   |                     |                          | B:38/382<br>A:19/382     | B:38/382<br>A:19/382     |                                     |                                | 5                                                             |
| Tang RH (2012) <sup>70</sup>    | 2011            | Yunnan                          | 784            | 12                                     |                                                   |                     |                          | B:72/784<br>A:29/784     | B:72/784<br>A:29/784     |                                     |                                | 5                                                             |
| Tang RH (2012) <sup>70</sup>    | 2011            | Yunnan                          | 533            | 24                                     |                                                   |                     |                          | B:54/533<br>A:26/533     | B:54/533<br>A:26/533     |                                     |                                | 5                                                             |
| Tang RH (2012) <sup>70</sup>    | 2011            | Yunnan                          | 406            | 36                                     |                                                   |                     |                          | B:48/406<br>A:15/406     | B:48/406<br>A:15/406     |                                     |                                | 5                                                             |
| Tang RH(2012) <sup>70</sup>     | 2011            | Yunnan                          | 457            | 48                                     |                                                   |                     |                          | B:76/457<br>A:10/457     | B:76/457<br>A:10/457     |                                     |                                | 5                                                             |
| Tang XY (2008) <sup>71</sup>    | 2006            | Hunan                           | 196            | 6                                      | B:87/196<br>A:5/196                               |                     |                          |                          |                          | B:10/196<br>A:51/196                | B:67/196<br>A:14/196           | 3                                                             |
| Tang YX (2013) <sup>72</sup>    | 2012            | Guangdong                       | 120            | 6                                      | B:24/120<br>A:10/120                              |                     |                          |                          |                          | B:1/120<br>A:7/120                  |                                | 3                                                             |
| Wang YZ (2008) <sup>73</sup>    | 2007            | Zhejiang                        | 237            | 12                                     | B:51/237<br>A:6/237                               |                     |                          |                          |                          | B:49/237<br>A:116/165               |                                | 3                                                             |
| Wei XL (2008) <sup>74</sup>     | 2007            | Shaanxi                         | 972            | 6                                      | B:183/972<br>A:18/667                             | B:19/972<br>A:1/667 |                          | B:34/972<br>A:343/667    | B:34/972<br>A:343/667    | B:391/972<br>A:4/667                | B:347/972<br>A:38/667          | 5                                                             |
| Xue LY (2006) <sup>75</sup>     | 2006            | Shanghai                        | 115            | 12                                     |                                                   |                     |                          |                          |                          |                                     |                                | 4                                                             |
| Yun Y(2014) <sup>76</sup>       | 2013            | Henan                           | 338            | 12                                     |                                                   |                     |                          |                          |                          | B:78/338<br>A:184/338               |                                | 5                                                             |

**Table S1** Studies reporting the changes in criminal activities, social wellbeing and family relations before and after entering MMT (*Continued*)

## Change of social functioning and family relations

| First Author,<br>Published Year | Study<br>Period | Study<br>Location<br>(Province) | Sample<br>size | Post-intervention<br>period<br>(month) | Arrested<br>rate    | Selling drugs      | Selling sex<br>for drugs | Drug-related<br>criminal | Employment<br>status   | Good<br>relationship<br>with family | Contacting<br>with former<br>drug-user<br>friends<br>everyday | Quality<br>Assessment<br>Score |
|---------------------------------|-----------------|---------------------------------|----------------|----------------------------------------|---------------------|--------------------|--------------------------|--------------------------|------------------------|-------------------------------------|---------------------------------------------------------------|--------------------------------|
| Zhang HF (2009) <sup>77</sup>   | 2008            | Shaanxi                         | 120            | 6                                      | B:11/120<br>A:3/120 | B:9/120<br>A:3/120 |                          |                          | B:21/120<br>A:36/120   |                                     |                                                               | 4                              |
| Zhang HY (2013) <sup>78</sup>   | 2011            | Beijing                         | 334            | 6                                      | B:9/334<br>A:0/187  |                    |                          |                          | B:72/334<br>A:62/187   | B:184/334<br>A:117/187              |                                                               | 3                              |
| Zhang J (2008) <sup>79</sup>    | 2007            | Jiangsu                         | 307            | 20                                     |                     |                    |                          |                          | B:67/307<br>A:136/220  |                                     |                                                               | 5                              |
| Zhao YT (2009) <sup>80</sup>    | 2006            | Guangdong                       | 65             | 6                                      | B:8/65<br>A:2/65    |                    |                          |                          | B:7/65<br>A:20/65      | B:15/65<br>A:43/65                  |                                                               | 6                              |
| Zheng WX (2012) <sup>81</sup>   | 2007            | Fujian                          | 585            | 6                                      |                     |                    |                          |                          | B:184/585<br>A:305/581 | B:343/585<br>A:307/581              | B:108/585<br>A:32/581                                         | 3                              |
| Zhu YH (2012) <sup>82</sup>     | 2012            | Jiangxi                         | 342            | 6                                      |                     |                    |                          |                          |                        | B:71/212<br>A:198/212               |                                                               | 4                              |

Note: B=Before entering MMT program; A=After entering MMT program

1  
2  
3  
4  
5 **Figure legends:**  
6

7 **Figure 1** Flow chart of selection of studies.  
8

9  
10 **Figure 2** Changes in criminal activities, social wellbeing and family relations before and after MMT

11 initiation: (A) rate of being arrested by police; (B) rate of drug-selling; (C) rate for selling sex for

12 drugs; (D) rate for drug-related crime, (E) employment rate; (F) rate of having good relationship with

13 family; (G) proportion of clients having contacts with former drug-user friends on a daily basis,  
14

15 among Chinese MMT clients at various intervention periods.  
16  
17  
18  
19  
20  
21  
22  
23  
24  
25  
26  
27  
28  
29  
30  
31  
32  
33  
34  
35  
36  
37  
38  
39  
40  
41  
42  
43  
44  
45  
46  
47  
48  
49  
50  
51  
52  
53  
54  
55  
56  
57  
58  
59  
60

## REFERENCES

1. Zhuang X, Liang Y, Chow EP, *et al.* HIV and HCV prevalence among entrants to maintenance treatment clinics in China: a systematic review and meta-analysis. *BMC Infect Dis* 2012;12:130.
2. Zhuang X, Wang Y, Chow EP, *et al.* Risk factors associated with HIV/HCV infection among entrants in methadone maintenance treatment clinics in China: A systematic review and meta-analysis. *Drug Alcohol Depend* 2012;126:286-95.
3. Kulsudjarit K. Drug problem in southeast and southwest Asia. *Ann N Y Acad Sci* 2004;1025:446-57.
4. Qian HZ, Schumacher JE, Chen HT, *et al.* Injection drug use and HIV/AIDS in China: review of current situation, prevention and policy implications. *Harm Reduct J* 2006; 3:4.
5. Ball AL, Rana S, Dehne KL. HIV prevention among injecting drug users: responses in developing and transitional countries. *Public Health Rep* 1998;113:S170-S81.
6. Stimson GV. Has the United Kingdom averted an epidemic of HIV-1 among drug injectors? *Addiction* 1996;91:1085-89.
7. Trathdee SA, Vlahov D. The effectiveness of needle exchange programs: A review of the science and policy. *AIDScience* 2001;1:1-31.
8. Dole VP, Nyswander M. A medical treatment for diacetylmorphine (heroin) addiction. *JAMA* 1965;193:646.
9. Isbell H, Vogel VH. The addiction liability of methadone (amidone, dolophine, 10820) and its use in the treatment of the morphine abstinence syndrome. *Am J of psychiatry* 1949;105:909.
10. Parrino MW. State methadone treatment guidelines. US Department of Health and Human Services, Public Health Service, Substance Abuse and Mental Health Services Administration, Center for Substance Abuse Treatment. 1993.
11. Gambashidze N, Sikharulidze Z, Piralishvili G, *et al.* Evaluation of pilot methadone maintenance therapy in Georgia (Caucasus). *Georgian Med News* 2008;160:25.
12. Tran BX, Ohinmaa A, Duong AT, *et al.* Changes in drug use are associated with health-related quality of life improvements among methadone maintenance patients with HIV/AIDS. *Qual Life Res* 2012;21:613-23.
13. Ball JC, Ross A. *The effectiveness of methadone maintenance treatment: Patients, programs, services, and outcome.* New York: Springer-Verlag Publishing, 1991.
14. Dole VP, Joseph H. Long-term outcome of patients treated with methadone maintenance. *Ann N Y Acad Sci* 1978;311:181-96.
15. Gearing FR, Schweitzer MD. An epidemiologic evaluation of long-term methadone maintenance treatment for heroin addiction. *Am J Epidemiol* 1974; 100:101.
16. Appel PW, Joseph H, Kott A, *et al.* Selected in-treatment outcomes of long-term methadone maintenance treatment patients in New York State. *Mt Sinai J Med* 2001;68:55-61.
17. Bertschy G. Methadone maintenance treatment: an update. *Eur Arch Psychiatry Clin Neurosci* 1995;245:114-24.
18. Fiellin DA, O'Connor PG, Chawarski M, *et al.* Methadone maintenance in primary care: a randomized controlled trial. *JAMA* 2001;286:1724-31.
19. Hartel DM, Schoenbaum EE. Methadone treatment protects against HIV infection: two decades of experience in the Bronx, New York City. *Public Health Reports* 1998;113:107.
20. Hubbard RL, Craddock SG, Flynn PM, *et al.* Overview of 1-year follow-up outcomes in the drug abuse treatment outcome study (DATOS). *Psychol Addict Behav* 1997;11:261-78.

- 1
  - 2
  - 3
  - 4
  - 5
  - 6
  - 7
  - 8
  - 9
  - 10
  - 11
  - 12
  - 13
  - 14
  - 15
  - 16
  - 17
  - 18
  - 19
  - 20
  - 21
  - 22
  - 23
  - 24
  - 25
  - 26
  - 27
  - 28
  - 29
  - 30
  - 31
  - 32
  - 33
  - 34
  - 35
  - 36
  - 37
  - 38
  - 39
  - 40
  - 41
  - 42
  - 43
  - 44
  - 45
  - 46
  - 47
  - 48
  - 49
  - 50
  - 51
  - 52
  - 53
  - 54
  - 55
  - 56
  - 57
  - 58
  - 59
  - 60
21. Joseph H, Woods J. A point in time: the impact of expanded methadone maintenance treatment on citywide crime and public health in New York City 1971-1973. *Arch public health* 1995;53:215-31.
22. Joseph H, Stancliff S, Langrod J. Methadone maintenance treatment (MMT): a review of historical and clinical issues. *Mt Sinai J Med* 2000;67:347-64.
23. Michels II, Stover H, Gerlach R. Substitution treatment for opioid addicts in Germany. *Harm Reduct J* 2007;4:5.
24. Pang L, Hao Y, Mi GD, *et al.* Effectiveness of first eight methadone maintenance treatment clinics in China. *AIDS* 2007;21:S103-S07.
25. Ward J, Hall W, Mattick RP. Role of maintenance treatment in opioid dependence. *Lancet* 1999; 353:221-26.
26. Wu Z. *Landmark government methadone maintenance program in mainland China*. 15th International AIDS Conference. 2004.
27. Wu Z. *Methadone maintenance program in mainland China: from pilot to scale-up*. International Conference on the Reduction of Drug Related Harm. 20-24. 2005.
28. Musa R, Bakar AZA, Khan UA. Two-Year Outcomes of Methadone Maintenance Therapy at a Clinic in Malaysia. *Asia Pac J Public Health* 2012;24:826-32.
29. Keen J, Rowse G, Mathers N, *et al.* Can methadone maintenance for heroin-dependent patients retained in general practice reduce criminal conviction rates and time spent in prison? *Br J Gen Pract* 2000;50:48.
30. Moher D, Liberati A, Tetzlaff J, *et al.* Preferred reporting items for systematic reviews and meta-analyses: the PRISMA statement. *PLoS Med* 2009;6:e1000097.
31. Boyle MH. Guidelines for evaluating prevalence studies. *Evidence Based Mental Health* 1998;1:37-39.
32. Guo W, Qu SQ, Ding ZW, *et al.* Situations and trends of HIV and syphilis infections among drug users in China, 1995-2009. *Chin J Epidemiol* 2010;31:666-69.
33. Jia MH, Luo HB, Ma YL, *et al.* The HIV epidemic in Yunnan province, China, 1989-2007. *J Acqui Immune Defic Syndr* 2010;53:S34-S40.
34. Connock M, Juarez-Garcia A, Jowett S, *et al.* Methadone and buprenorphine for the management of opioid dependence: a systematic review and economic evaluation: Gray on behalf of the National Coordinating Centre for Health Technology Assessment. *Health Technol Assess* 2007;11:1-171, iii-iv.
35. Mutasa H. Risk factors associated with noncompliance with methadone substitution therapy (MST) and relapse among chronic opiate users in an Outer London community. *J Adv Nurs* 2001;35:97-107.
36. Padaiga Z, Subata E, Vanagas G. Outpatient methadone maintenance treatment program. Quality of life and health of opioid-dependent persons in Lithuania. *Medicina (Kaunas)* 2007; 43:235-41.
37. Ponizovsky AM, Grinshpoon A. Quality of life among heroin users on buprenorphine versus methadone maintenance. *Am J Drug Alcohol Abuse* 2007;33:631-42.
38. Marsch LA. The efficacy of methadone maintenance interventions in reducing illicit opiate use, HIV risk behavior and criminality: a meta-analysis. *Addiction* 1998;93:515-32.
39. Holloway KR, Bennett TH, Farrington DP. The effectiveness of drug treatment programs in reducing criminal behavior: a meta-analysis. *Psicothema* 2006;18:620-29.
40. Shi J, Zhao LY, Epstein DH, *et al.* The effect of methadone maintenance on illicit opioid use,

- human immunodeficiency virus and hepatitis C virus infection, health status, employment, and criminal activity among heroin abusers during 6 months of treatment in China. *J Addict Med* 2007;1:186.
41. Coviello DM, Zanis DA, Wesnoski SA, *et al.* An integrated drug counseling and employment intervention for methadone clients. *J Psychoactive Drugs* 2009;41:189-97.
  42. Blix O. Methadone maintenance programs in Sweden. *JAMA* 1989;261:2202.
  43. Pang L, Mi GD, Wang CH, *et al.* Evaluation of first 8 pilot methadone maintenance treatment clinics in China. *Chin J Exp Clin Virol* 2007;21:2-4.
  44. Chen B, Zhou BQ, Zhang HY, *et al.* Effective Evaluation of Methadone Maintenance Treatment Among Drug Users in Zhuhai. *Pract Prev Med* 2011;18:364-65.
  45. Chen GH, Yang HT, Qian XC, *et al.* Effectiveness evaluation of six month community-based methadone treatment in Jiangsu Province. *Chin J AIDS STD* 2008;14:590-93.
  46. Judd LL, Marston MG, Attkisson C, *et al.* Effective medical treatment of opiate addiction. National Consensus Development Panel on Effective Medical Treatment of Opiate Addiction. *JAMA* 1998;280:1936-43.
  47. Magura S, Nwakeze PC, Demsky SY. Pre- and in-treatment predictors of retention in methadone treatment using survival analysis. *Addiction* 1998;93:51-60.
  48. Cai WB, Li FZ, Dong X, *et al.* Efficacy evaluation of methadone maintenance therapy on drug users in Tenchong County, Yunnan Province. *Chin J for Clin* 2013;41:42-43.
  49. Chen W, Zhao LL, Ling L, *et al.* Effectiveness evaluation on initial methadone maintenance treatment at community clinics in Guangdong province. *Chin J Public Health* 2009;25:1416-18.
  50. Chen W, Ling L, He Q, *et al.* Performance evaluation and policy recommendations on community methadone maintenance treatment in Guangdong Province. *Chin J Health Policy* 2010;3:39-44.
  51. Duan YJ, Yin ZL, Xi CH, *et al.* Effect assessment of methadone maintenance treatment among heroin addicts in Ruili city. *Chin J AIDS STD* 2008;14:240-42.
  52. Fan LR, Fang WH. The effect of methadone maintenance treatment and social support intervention. *Chin J AIDS STD* 2012;18:424-24.
  53. Feng SQ, Zhou JB, Guo YL, *et al.* Effective evaluation of community-based methadone maintenance treatment for heroin addicts. *Chin J Public Health* 2010;26:924-25.
  54. Fu JH, Hong LY, Li ZJ, *et al.* Investigation of intervention effects on dropouts in high risk from methadone maintenance treatment. *Jiangxi Med J* 2010;45:932-34.
  55. Fu LP, Li F, Zhang ZZ, *et al.* Effective evaluation on parts of community-based methadone maintenance treatment clinics for heroin addicts in Xinjiang. *Endem Dis Bull* 2007; 22:17-19.
  56. Guo Y, Zhang XB. Analysis of methadone maintenance treatment of AIDS demonstration areas in Yunnan province. *Chin J AIDS STD* 2007;13:7-8,14.
  57. Han YB, Dong BQ, Li RJ, *et al.* Effective evaluation of methadone maintenance treatment for 6-month in heroin addicts. *J Appl Prev Med* 2012;18:70-74.
  58. Hu WS, Wang DP, Huang X, *et al.* Analysis of the efficacy of medicine(methadone) maintenance treatment in 125 cases of heroin dependence patients. *Chin J Drug Abuse Prev Treat* 2010;16:86-88.
  59. Huang YJ, Huang JG, Kai L, *et al.* An outcome assessment on methadone maintenance treatment in Youjiang district, Baise city. *J Youjiang Med Univ for Nat* 2012;34:461-63.
  60. Jiang A, Zhao JH, Wang XZ, *et al.* Effect analysis of the heroin addicts with methadone maintenance treatment in experimental units of Wuzhong in Ningxia. *Mod Prev Med* 2009;

- 36:2920-22.
61. Liu JB, DiLiXiaTi YHP, Li F, *et al.* The effective evaluation of the methadone maintenance treatment of heroin addicts. *Chin J Drug Abuse Prev Treat* 2007;13:10-13.
  62. Liu JK, Li LH, Chen YH, *et al.* Evaluation of Methadone Maintenance Treatment for Heroin Users in Panzhihua. *J Prev Med Inf* 2009;25:723-25.
  63. Liu WY, Wang S, Gong B, *et al.* Effective Evaluation of Methadone Maintenance Treatment Combined with Comprehensive Intervention for Six Months. *Acta Med Univ Scientiae et Technologiae Huazhong* 2012;41:190-94.
  64. Liu YJ, Deng PX, Xiong XY, *et al.* Effective evaluation on methadone maintenance treatment in Chaoyang district, Beijing. *Chin J Drug Depend* 2007;16:302-06.
  65. Long ZY, Wu ZY, Du B, *et al.* Situation of 538 heroin addicts undertaking methadone maintenance treatment. *Chin J Drug Depend* 2006;15:38-40.
  66. Lu JJ. Survey analysis on opiate addicts' Behaviors before and after Methadone maintenance treatment. *J Liaoning Med Univ* 2010;31:541-43.
  67. Qian YH. Effect of methadone maintenance therapy on drug users in Wuxi. *Occup and Health* 2008;24:450-52.
  68. Qu BW, Gao XX, Huang MJ, *et al.* Analysis of the efficacy of methadone maintenance therapy among heroin-addicts in Jiangmen Urban. *Mod Hosp* 2009;9:142-43.
  69. Tang XJ, Wang S, Gong B, *et al.* Evaluating the effect of comprehensive intervention on people treated with methadone maintenance for six months. *Chin Health Serv Manage* 2012;29:630-33.
  70. Tang RH, Duan S, Yang YC, *et al.* Analysis on social effects of methadone maintenance treatment in Dehong Prefecture, Yunnan Province. *Chin J Dis Control Prev* 2012;16:1044-48.
  71. Tang XY, Hou SQ, Tang JH. Hunan Beihu methadone maintenance treatment in socio-economic evaluation. *Chin J Drug Depend* 2008;17:380-82.
  72. Tang YX, Shao ZM, Liang ZM, *et al.* Effective Evaluation of Methadone Maintenance Treatment among 120 drug abusers in Chancheng District. *Guangdong Med J* 2013;34:3447-49.
  73. Wang YZ, Sun J. Analysis of the efficacy of methadone maintenance treatment in 237 cases of heroin dependence patients. *Prac J Med Pharm* 2008;25:1304-06.
  74. Wei XL, Li HX, Ma CF, *et al.* Effective evaluation of methadone maintenance treatment for heroin dependent patients in Xi'an city. *Chin J Drug Depend* 2008;17:197-200.
  75. Xue LY, Xu CL, Pan QC, *et al.* Evaluation of the therapeutic effect of methadone maintenance in 115 cases of heroin addicts. *Chin J Drug Abuse Prev Treat* 2006;12:255-57.
  76. Yun Y, Zhou DS, Yang J. 338 cases of opium addicts insist on methadone maintenance treatment effect analysis. *Chin J Drug Abuse Prev Treat* 2014;20:262-66.
  77. Zhang HF, Deng KW, Zhang YF, *et al.* Efficacy evaluation on methadone maintenance treatment in Hanzhou Shaanxi. *Chin J Drug Depend* 2009; 18:43-46.
  78. Zhang HY. Study on the effect and impact factors of methadone maintenance treatment in Dongcheng district, Beijing. *Cap J Public Health* 2013;7:54-57.
  79. Zhang J, Xu YK, Li LM, *et al.* Evaluation of the effect of methadone maintenance treatment among heroin addicts. *Chin J Abuse Prev Treat* 2008;14:318-20.
  80. Zhao YT, Xu HF, Fan LR. Evaluation for the Community-Based Methadone Maintenance Treatment in Guangzhou City. *J Trop Med* 2009;9:329-31.
  81. Zheng WX, Chen K. Evaluation for the methadone maintenance treatment in Fujian Province. *Strait J Prev Med* 2012;18:72-74.

- 1  
2  
3 82. Zhu YH, Wang X, Huang M. Evaluation of Effect of Community-based Methadone Maintenance  
4 Treatment for Addicts. J Jiujiang Univ 2012;27:25-28.  
5  
6  
7  
8  
9  
10  
11  
12  
13  
14  
15  
16  
17  
18  
19  
20  
21  
22  
23  
24  
25  
26  
27  
28  
29  
30  
31  
32  
33  
34  
35  
36  
37  
38  
39  
40  
41  
42  
43  
44  
45  
46  
47  
48  
49  
50  
51  
52  
53  
54  
55  
56  
57  
58  
59  
60

For peer review only



1  
2  
3  
4  
5  
6  
7  
8  
9  
10  
11  
12  
13  
14  
15  
16  
17  
18  
19  
20  
21  
22  
23  
24  
25  
26  
27  
28  
29  
30  
31  
32  
33  
34  
35  
36  
37  
38  
39  
40  
41  
42  
43  
44  
45  
46  
47  
48  
49  
50  
51  
52  
53  
54  
55  
56  
57  
58  
59  
60

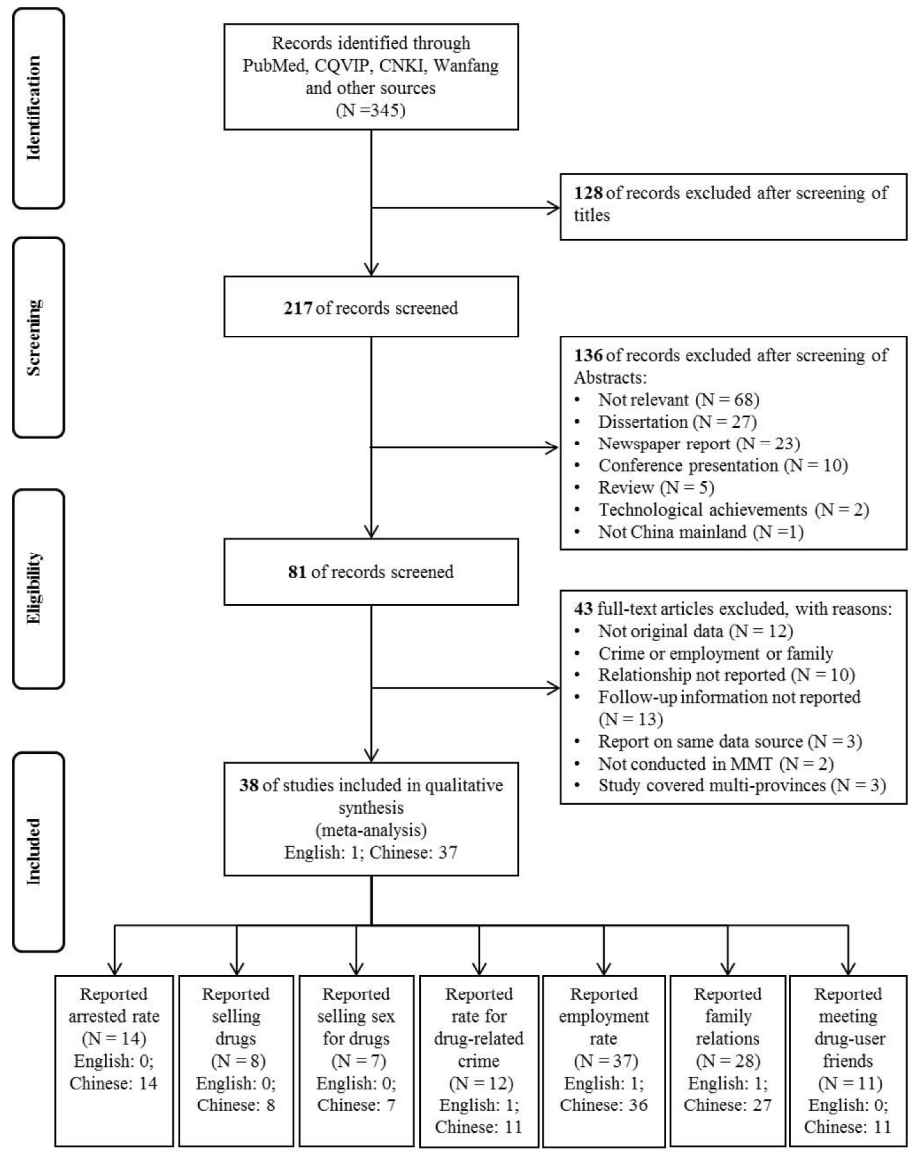

270x359mm (300 x 300 DPI)

1  
2  
3  
4  
5  
6  
7  
8  
9  
10  
11  
12  
13  
14  
15  
16  
17  
18  
19  
20  
21  
22  
23  
24  
25  
26  
27  
28  
29  
30  
31  
32  
33  
34  
35  
36  
37  
38  
39  
40  
41  
42  
43  
44  
45  
46  
47  
48  
49  
50  
51  
52  
53  
54  
55  
56  
57  
58  
59  
60

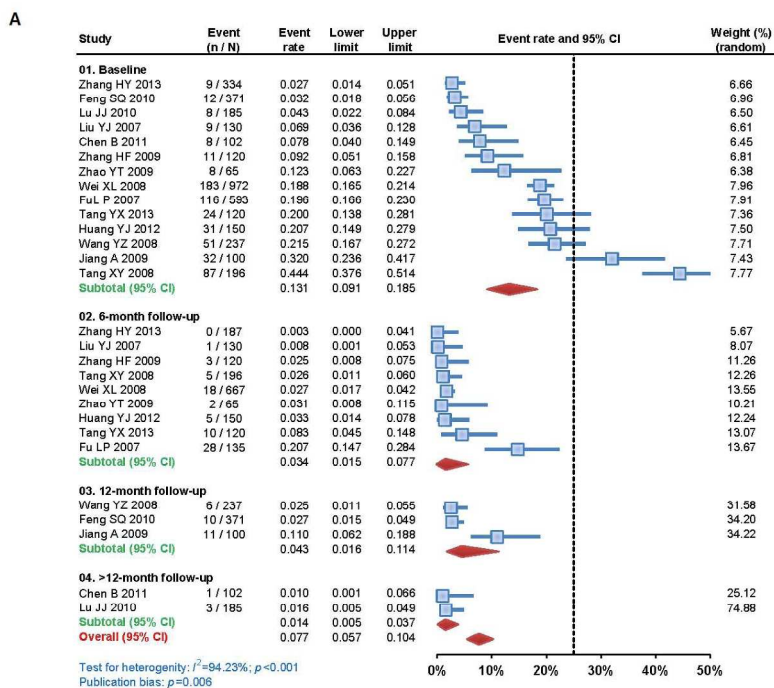

437x309mm (300 x 300 DPI)

view only

1  
2  
3  
4  
5  
6  
7  
8  
9  
10  
11  
12  
13  
14  
15  
16  
17  
18  
19  
20  
21  
22  
23  
24  
25  
26  
27  
28  
29  
30  
31  
32  
33  
34  
35  
36  
37  
38  
39  
40  
41  
42  
43  
44  
45  
46  
47  
48  
49  
50  
51  
52  
53  
54  
55  
56  
57  
58  
59  
60

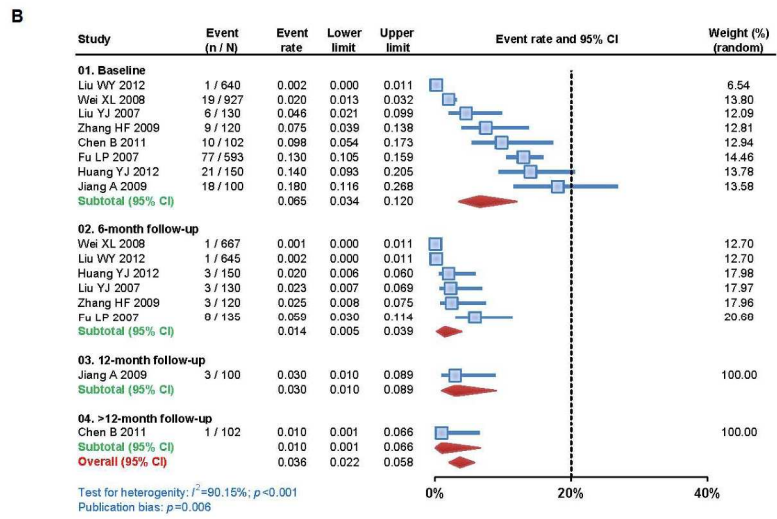

437x232mm (300 x 300 DPI)

review only

C

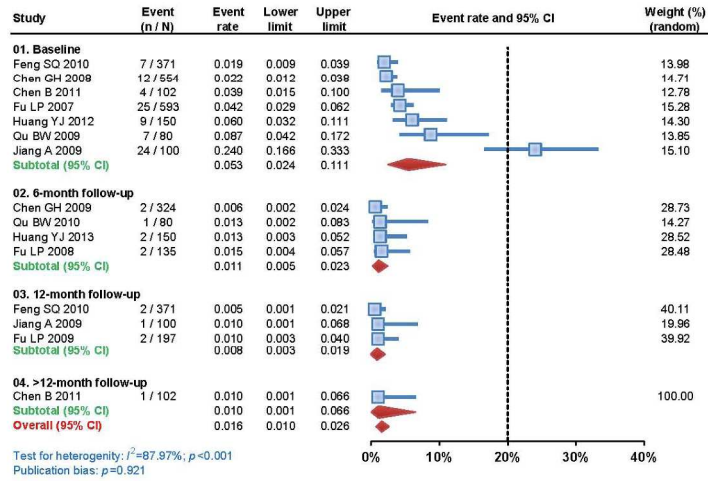

437x226mm (300 x 300 DPI)

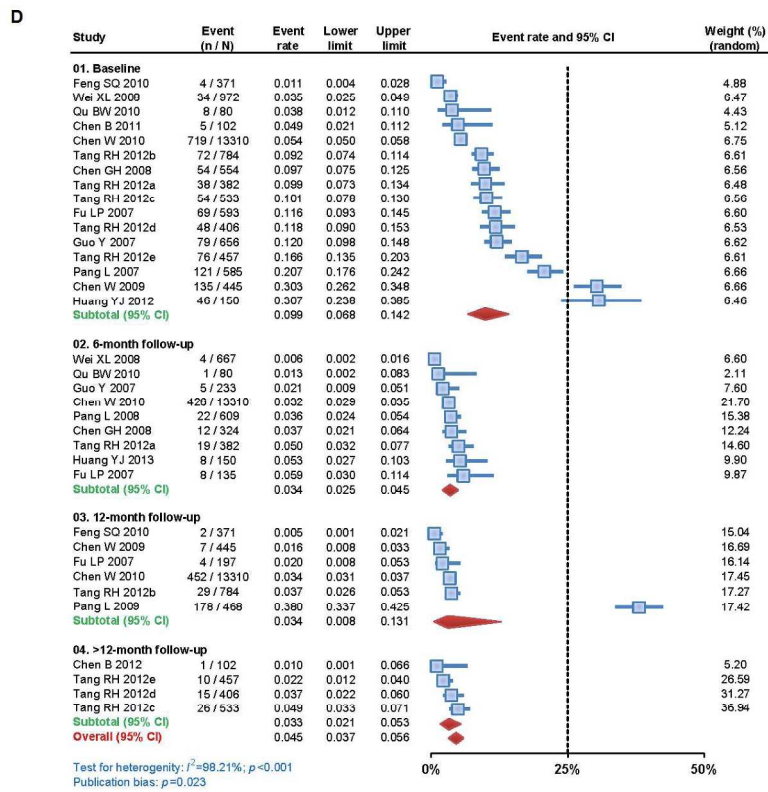

437x354mm (300 x 300 DPI)

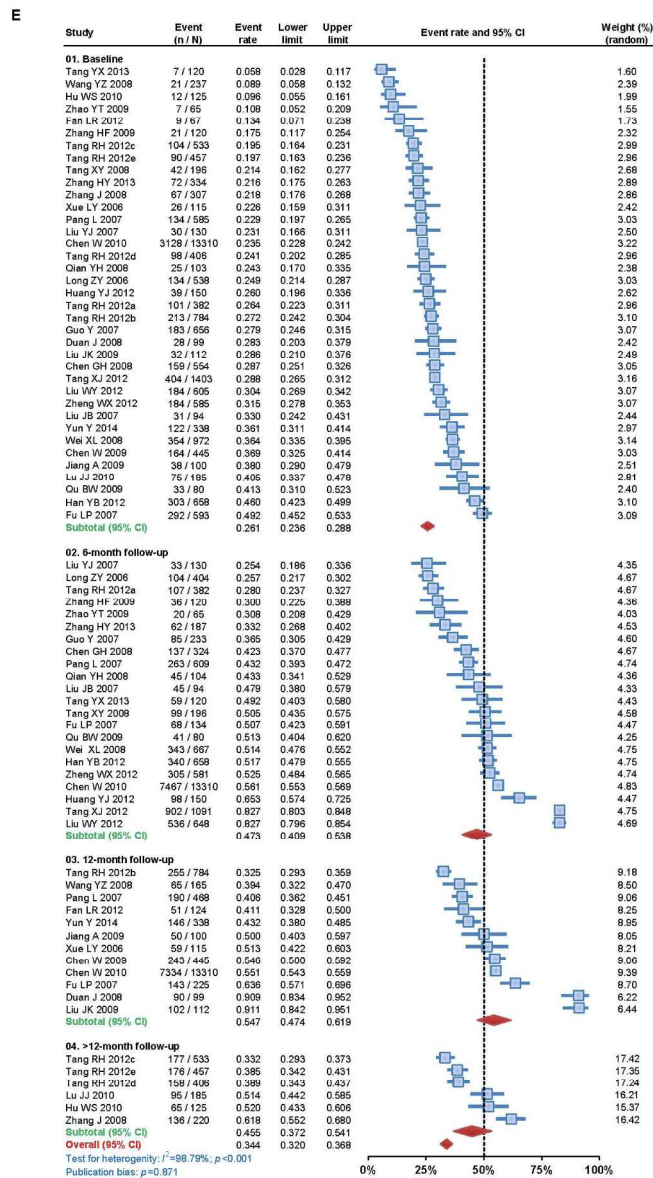

210x297mm (300 x 300 DPI)

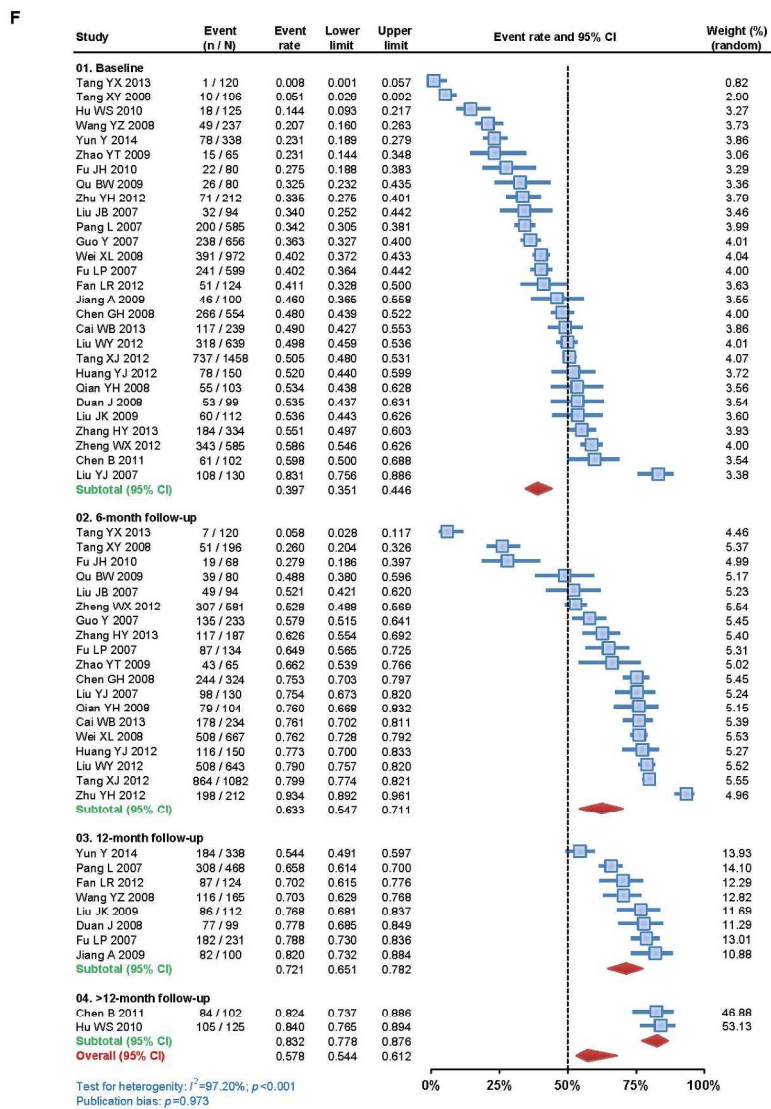

437x491mm (300 x 300 DPI)

1  
2  
3  
4  
5  
6  
7  
8  
9  
10  
11  
12  
13  
14  
15  
16  
17  
18  
19  
20  
21  
22  
23  
24  
25  
26  
27  
28  
29  
30  
31  
32  
33  
34  
35  
36  
37  
38  
39  
40  
41  
42  
43  
44  
45  
46  
47  
48  
49  
50  
51  
52  
53  
54  
55  
56  
57  
58  
59  
60

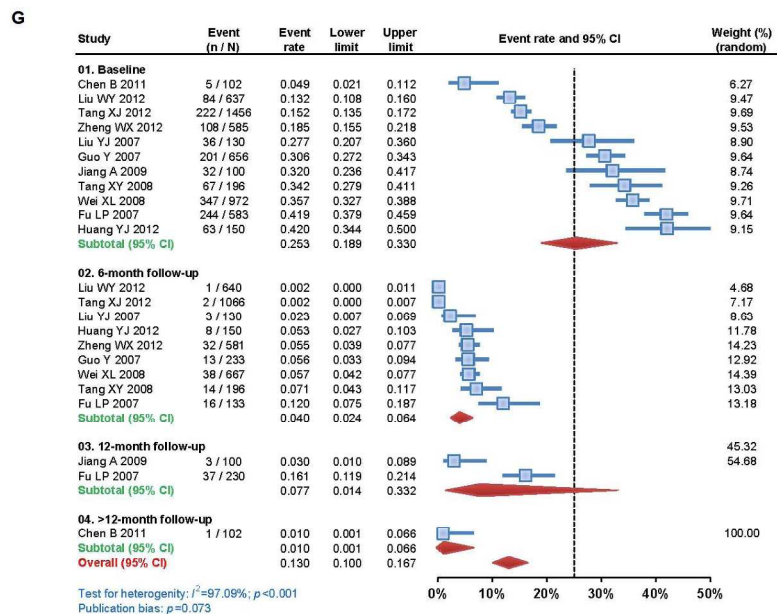

437x278mm (300 x 300 DPI)

Review only



**Table S1** Studies reporting the changes in criminal activities, social wellbeing and family relations before and after entering MMT

## Change of social functioning and family relations

| First Author,<br>Published Year | Study<br>Period | Study<br>Location<br>(Province) | Sample<br>size | Post-intervention<br>period<br>(month) | Change of social functioning and family relations |                     |                          |                              |                              |                                     |                                                                   | Quality<br>Assessment<br>Score |
|---------------------------------|-----------------|---------------------------------|----------------|----------------------------------------|---------------------------------------------------|---------------------|--------------------------|------------------------------|------------------------------|-------------------------------------|-------------------------------------------------------------------|--------------------------------|
|                                 |                 |                                 |                |                                        | Arrested rate                                     | Selling drugs       | Selling sex<br>for drugs | Drug-related<br>criminal     | Employment<br>status         | Good<br>relationship<br>with family | Contacting<br>with<br>former drug-<br>user<br>friends<br>everyday |                                |
| Cai WB (2013) <sup>48</sup>     | 2013            | Yunnan                          | 365            | 6                                      |                                                   |                     |                          |                              |                              | B:117/239<br>A:178/234              |                                                                   | 3                              |
| Chen B (2011) <sup>44</sup>     | 2009            | Guangdong                       | 102            | 36                                     | B:8/102<br>A:1/102                                | B:10/102<br>A:1/102 | B:4/102<br>A:1/102       | B:5/102<br>A:1/102           |                              | B:61/102<br>A:84/102                | B:5/102<br>A:1/102                                                | 4                              |
| Chen GH (2008) <sup>45</sup>    | 2006            | Jiangsu                         | 554            | 6                                      |                                                   |                     | B:54/554<br>A:2/324      | B:12/554<br>A:12/324         | B:159/554<br>A:137/324       | B:266/554<br>A:244/324              |                                                                   | 3                              |
| Chen W (2009) <sup>49</sup>     | 2008            | Guangdong                       | 445            | 12                                     |                                                   |                     |                          | B:135/445<br>A:7/445         | B:164/445<br>A:243/445       |                                     |                                                                   | 5                              |
| Chen W (2010) <sup>50</sup>     | 2008            | Guangdong                       | 13310          | 6                                      |                                                   |                     |                          | B:719/13310<br>A:426/13310   | B:3128/13310<br>A:7467/13310 |                                     |                                                                   | 4                              |
| Chen W (2010) <sup>50</sup>     | 2008            | Guangdong                       | 13310          | 12                                     |                                                   |                     |                          | B: 719/13310<br>A: 452/13310 | B:3128/13310<br>A:7334/13310 |                                     |                                                                   | 4                              |
| Duan YJ (2008) <sup>51</sup>    | 2006            | Yunnan                          | 99             | 12                                     |                                                   |                     |                          |                              | B:28/99<br>A:90/99           | B:53/99<br>A:7799                   |                                                                   | 3                              |
| Fan LR (2012) <sup>52</sup>     | 2010            | Jiangxi                         | 124            | 12                                     |                                                   |                     |                          |                              | B:9/67<br>A:51/124           | B:51/124<br>A:87/124                |                                                                   | 3                              |
| Feng SQ (2010) <sup>53</sup>    | 2008            | Jiangsu                         | 371            | 12                                     | B:12/371<br>A:10/371                              |                     | B:7/371<br>A:2/371       | B:4/371<br>A:2/371           |                              |                                     |                                                                   | 4                              |
| Fu JH (2010) <sup>54</sup>      | 2008            | Jiangxi                         | 80             | 6                                      |                                                   |                     |                          |                              |                              | B:22/80<br>A:19/68                  |                                                                   | 4                              |
| Fu LP (2007) <sup>55</sup>      | 2006            | Xinjiang                        | 958            | 6                                      | B:116/593<br>A:28/135                             | B:77/593<br>A:8/135 | B:25/593<br>A:2/135      | B:69/593<br>A:8/135          | B:292/593<br>A:68/134        | B:241/599<br>A:87/134               | B:244/583<br>A:16/133                                             | 3                              |
| Fu LP (2007) <sup>55</sup>      | 2006            | Xinjiang                        | 958            | 12                                     |                                                   |                     | B:25/593<br>A:2/197      | B:69/593<br>A:4/197          | B:292/593<br>A:143/225       | B:241/599<br>A:182/231              | B:244/583<br>A:37/230                                             | 3                              |
| Guo Y (2007) <sup>56</sup>      | 2006            | Yunnan                          | 656            | 6                                      |                                                   |                     |                          | B:79/656<br>A:5 /233         | B:183/656<br>A:85 /233       | B:238/656<br>A:135/233              | B:201/656<br>A:13/233                                             | 5                              |

**Table S1** Studies reporting the changes in criminal activities, social wellbeing and family relations before and after entering MMT (*Continued*)

## Change of social functioning and family relations

| First Author,<br>Published Year | Study<br>Period | Study<br>Location<br>(Province) | Sample<br>size | Post-intervention<br>period<br>(month) | Change of social functioning and family relations |                     |                          |                          |                        |                                     |                                                               | Quality<br>Assessment<br>Score |
|---------------------------------|-----------------|---------------------------------|----------------|----------------------------------------|---------------------------------------------------|---------------------|--------------------------|--------------------------|------------------------|-------------------------------------|---------------------------------------------------------------|--------------------------------|
|                                 |                 |                                 |                |                                        | Arrested rate                                     | Selling drugs       | Selling sex<br>for drugs | Drug-related<br>criminal | Employment<br>status   | Good<br>relationship<br>with family | Contacting<br>with former<br>drug-user<br>friends<br>everyday |                                |
| Han YB (2012) <sup>57</sup>     | 2009            | Guangxi                         | 1123           | 6                                      |                                                   |                     |                          |                          | B:303/658<br>A:340/658 |                                     |                                                               | 4                              |
| Hu WS (2010) <sup>58</sup>      | 2008            | Guangdong                       | 125            | 22                                     |                                                   |                     |                          |                          | B:12/125<br>A:65/125   | B:18/125<br>A:105/125               |                                                               | 4                              |
| Huang YJ(2012) <sup>59</sup>    | 2010            | Guangxi                         | 150            | 6                                      | B:31/150<br>A:5/150                               | B:21/150<br>A:3/150 | B:9/150<br>A:2/150       | B:46/150<br>A:8/150      | B:39/150<br>A:98/150   | B:78/150<br>A:116/150               | B:63/150<br>A:8/150                                           | 5                              |
| Jiang A (2009) <sup>60</sup>    | 2007            | Ningxia                         | 100            | 12                                     | B:32/100<br>A:11/100                              | B:18/100<br>A:3/100 | B:24/100<br>A:1/100      |                          | B:38/100<br>A:50/100   | B:46/100<br>A:82/100                | B:32/100<br>A:3/100                                           | 4                              |
| Liu JB (2007) <sup>61</sup>     | 2005            | Xinjiang                        | 170            | 6                                      |                                                   |                     |                          |                          | B:31/94<br>A:45/94     | B:32/94<br>A:49/94                  |                                                               | 4                              |
| Liu JK (2009) <sup>62</sup>     | 2006            | Sichuan                         | 112            | 12                                     |                                                   |                     |                          |                          | B:32/112<br>A:102/112  | B:60/112<br>F86/112                 |                                                               | 3                              |
| Liu WY(2012) <sup>63</sup>      | 2010            | Chongqing                       | 650            | 6                                      |                                                   | B:1/640<br>A:1/645  |                          |                          | B:184/605<br>A:536/648 | B:318/639<br>A:508/643              | B:84/637<br>A:1/640                                           | 3                              |
| Liu YJ (2007) <sup>64</sup>     | 2007            | Beijing                         | 130            | 6                                      | B:9/130<br>A:1/130                                | B:6/130<br>A:3/130  |                          |                          | B:30/130<br>A:33/130   | B:108/130<br>A:98/130               | B:36/130<br>A:3/130                                           | 3                              |
| Long ZY (2006) <sup>65</sup>    | 2005            | Guizhou                         | 538            | 6                                      |                                                   |                     |                          |                          | B:134/538<br>A:104/404 |                                     |                                                               | 4                              |
| Lu JJ (2010) <sup>66</sup>      | 2010            | Jiangsu                         | 185            | 36                                     | B:8/185<br>A:3/185                                |                     |                          |                          | B:75/185<br>A:95/185   |                                     |                                                               | 5                              |
| Pang L (2007) <sup>24</sup>     | 2004            | Beijing                         | 609            | 6                                      |                                                   |                     |                          | B:121/585<br>A:22/609    | B:134/585<br>A:263/609 |                                     |                                                               | 5                              |
| Pang L (2007) <sup>24</sup>     | 2004            | Beijing                         | 468            | 12                                     |                                                   |                     |                          | B:121/585<br>A:178/468   | B:134/585<br>A:190/468 | B:200/585<br>A:308/468              |                                                               | 5                              |
| Qian YH (2008) <sup>67</sup>    | 2007            | Jiangsu                         | 965            | 6                                      |                                                   |                     |                          |                          | B:25/103<br>A:45/104   | B:55/103<br>A:79/104                |                                                               | 4                              |

**Table S1** Studies reporting the changes in criminal activities, social wellbeing and family relations before and after entering MMT (*Continued*)

| Change of social functioning and family relations |                 |                                 |                |                                        |                       |                     |                          |                          |                          |                                     |                                                               |                                |
|---------------------------------------------------|-----------------|---------------------------------|----------------|----------------------------------------|-----------------------|---------------------|--------------------------|--------------------------|--------------------------|-------------------------------------|---------------------------------------------------------------|--------------------------------|
| First Author,<br>Published Year                   | Study<br>Period | Study<br>Location<br>(Province) | Sample<br>size | Post-intervention<br>period<br>(month) | Arrested rate         | Selling drugs       | Selling sex<br>for drugs | Drug-related<br>criminal | Drug-related<br>criminal | Good<br>relationship<br>with family | Contacting<br>with former<br>drug-user<br>friends<br>everyday | Quality<br>Assessment<br>Score |
| Qu BW (2009) <sup>68</sup>                        | 2007            | Guangdong                       | 80             | 6                                      |                       |                     | B:7/80<br>A:1/80         | B:3/80<br>A:1/80         | B:3/80<br>A:1/80         | B:26/80<br>A:39/80                  |                                                               | 6                              |
| Tang XJ (2012) <sup>69</sup>                      | 2010            | Chongqing                       | 1477           | 6                                      |                       |                     |                          |                          |                          | B:737/1458<br>A:864/1082            | B:222/1456<br>A:2/1066                                        | 3                              |
| Tang RH (2012) <sup>70</sup>                      | 2011            | Yunnan                          | 382            | 6                                      |                       |                     |                          | B:38/382<br>A:19/382     | B:38/382<br>A:19/382     |                                     |                                                               | 5                              |
| Tang RH (2012) <sup>70</sup>                      | 2011            | Yunnan                          | 784            | 12                                     |                       |                     |                          | B:72/784<br>A:29/784     | B:72/784<br>A:29/784     |                                     |                                                               | 5                              |
| Tang RH (2012) <sup>70</sup>                      | 2011            | Yunnan                          | 533            | 24                                     |                       |                     |                          | B:54/533<br>A:26/533     | B:54/533<br>A:26/533     |                                     |                                                               | 5                              |
| Tang RH (2012) <sup>70</sup>                      | 2011            | Yunnan                          | 406            | 36                                     |                       |                     |                          | B:48/406<br>A:15/406     | B:48/406<br>A:15/406     |                                     |                                                               | 5                              |
| Tang RH(2012) <sup>70</sup>                       | 2011            | Yunnan                          | 457            | 48                                     |                       |                     |                          | B:76/457<br>A:10/457     | B:76/457<br>A:10/457     |                                     |                                                               | 5                              |
| Tang XY (2008) <sup>71</sup>                      | 2006            | Hunan                           | 196            | 6                                      | B:87/196<br>A:5/196   |                     |                          |                          |                          | B:10/196<br>A:51/196                | B:67/196<br>A:14/196                                          | 3                              |
| Tang YX (2013) <sup>72</sup>                      | 2012            | Guangdong                       | 120            | 6                                      | B:24/120<br>A:10/120  |                     |                          |                          |                          | B:1/120<br>A:7/120                  |                                                               | 3                              |
| Wang YZ (2008) <sup>73</sup>                      | 2007            | Zhejiang                        | 237            | 12                                     | B:51/237<br>A:6/237   |                     |                          |                          |                          | B:49/237<br>A:116/165               |                                                               | 3                              |
| Wei XL (2008) <sup>74</sup>                       | 2007            | Shaanxi                         | 972            | 6                                      | B:183/972<br>A:18/667 | B:19/972<br>A:1/667 |                          | B:34/972<br>A:343/667    | B:34/972<br>A:343/667    | B:391/972<br>A:4/667                | B:347/972<br>A:38/667                                         | 5                              |
| Xue LY (2006) <sup>75</sup>                       | 2006            | Shanghai                        | 115            | 12                                     |                       |                     |                          |                          |                          |                                     |                                                               | 4                              |
| Yun Y(2014) <sup>76</sup>                         | 2013            | Henan                           | 338            | 12                                     |                       |                     |                          |                          |                          | B:78/338<br>A:184/338               |                                                               | 5                              |

**Table S1** Studies reporting the changes in criminal activities, social wellbeing and family relations before and after entering MMT (*Continued*)

## Change of social functioning and family relations

| First Author,<br>Published Year | Study<br>Period | Study<br>Location<br>(Province) | Sample<br>size | Post-intervention<br>period<br>(month) | Arrested<br>rate    | Selling drugs      | Selling sex<br>for drugs | Drug-related<br>criminal | Employment<br>status   | Good<br>relationship<br>with family | Contacting<br>with former<br>drug-user<br>friends<br>everyday | Quality<br>Assessment<br>Score |
|---------------------------------|-----------------|---------------------------------|----------------|----------------------------------------|---------------------|--------------------|--------------------------|--------------------------|------------------------|-------------------------------------|---------------------------------------------------------------|--------------------------------|
| Zhang HF (2009) <sup>77</sup>   | 2008            | Shaanxi                         | 120            | 6                                      | B:11/120<br>A:3/120 | B:9/120<br>A:3/120 |                          |                          | B:21/120<br>A:36/120   |                                     |                                                               | 4                              |
| Zhang HY (2013) <sup>78</sup>   | 2011            | Beijing                         | 334            | 6                                      | B:9/334<br>A:0/187  |                    |                          |                          | B:72/334<br>A:62/187   | B:184/334<br>A:117/187              |                                                               | 3                              |
| Zhang J (2008) <sup>79</sup>    | 2007            | Jiangsu                         | 307            | 20                                     |                     |                    |                          |                          | B:67/307<br>A:136/220  |                                     |                                                               | 5                              |
| Zhao YT (2009) <sup>80</sup>    | 2006            | Guangdong                       | 65             | 6                                      | B:8/65<br>A:2/65    |                    |                          |                          | B:7/65<br>A:20/65      | B:15/65<br>A:43/65                  |                                                               | 6                              |
| Zheng WX (2012) <sup>81</sup>   | 2007            | Fujian                          | 585            | 6                                      |                     |                    |                          |                          | B:184/585<br>A:305/581 | B:343/585<br>A:307/581              | B:108/585<br>A:32/581                                         | 3                              |
| Zhu YH (2012) <sup>82</sup>     | 2012            | Jiangxi                         | 342            | 6                                      |                     |                    |                          |                          |                        | B:71/212<br>A:198/212               |                                                               | 4                              |

Note: B=Before entering MMT program; A=After entering MMT program

1  
2  
3  
4  
5  
6  
7  
8  
9  
10  
11  
12  
13  
14  
15  
16  
17  
18  
19  
20  
21  
22  
23  
24  
25  
26  
27  
28  
29  
30  
31  
32  
33  
34  
35  
36  
37  
38  
39  
40  
41  
42  
43  
44  
45  
46  
47  
48  
49  
50  
51  
52  
53  
54  
55  
56  
57  
58  
59  
60

For peer review only

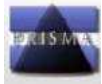

# PRISMA 2009 Checklist

| Section/topic                      | #  | Checklist item                                                                                                                                                                                                                                                                                              | Reported on page #                       |
|------------------------------------|----|-------------------------------------------------------------------------------------------------------------------------------------------------------------------------------------------------------------------------------------------------------------------------------------------------------------|------------------------------------------|
| <b>TITLE</b>                       |    |                                                                                                                                                                                                                                                                                                             |                                          |
| Title                              | 1  | Identify the report as a systematic review, meta-analysis, or both.                                                                                                                                                                                                                                         | Both Page 1                              |
| <b>ABSTRACT</b>                    |    |                                                                                                                                                                                                                                                                                                             |                                          |
| Structured summary                 | 2  | Provide a structured summary including, as applicable: background; objectives; data sources; study eligibility criteria, participants, and interventions; study appraisal and synthesis methods; results; limitations; conclusions and implications of key findings; systematic review registration number. | Page 2 Abstract                          |
| <b>INTRODUCTION</b>                |    |                                                                                                                                                                                                                                                                                                             |                                          |
| Rationale                          | 3  | Describe the rationale for the review in the context of what is already known.                                                                                                                                                                                                                              | Page 4 Paragraph 3                       |
| Objectives                         | 4  | Provide an explicit statement of questions being addressed with reference to participants, interventions, comparisons, outcomes, and study design (PICOS).                                                                                                                                                  | N/A                                      |
| <b>METHODS</b>                     |    |                                                                                                                                                                                                                                                                                                             |                                          |
| Protocol and registration          | 5  | Indicate if a review protocol exists, if and where it can be accessed (e.g., Web address), and, if available, provide registration information including registration number.                                                                                                                               | N/A                                      |
| Eligibility criteria               | 6  | Specify study characteristics (e.g., PICOS, length of follow-up) and report characteristics (e.g., years considered, language, publication status) used as criteria for eligibility, giving rationale.                                                                                                      | Page 5 Inclusion/exclusion criteria      |
| Information sources                | 7  | Describe all information sources (e.g., databases with dates of coverage, contact with study authors to identify additional studies) in the search and date last searched.                                                                                                                                  | Page 5 Paragraph 1                       |
| Search                             | 8  | Present full electronic search strategy for at least one database, including any limits used, such that it could be repeated.                                                                                                                                                                               | Page 5 Paragraph 1                       |
| Study selection                    | 9  | State the process for selecting studies (i.e., screening, eligibility, included in systematic review, and, if applicable, included in the meta-analysis).                                                                                                                                                   | Page 5 Paragraph 1                       |
| Data collection process            | 10 | Describe method of data extraction from reports (e.g., piloted forms, independently, in duplicate) and any processes for obtaining and confirming data from investigators.                                                                                                                                  | Page 6 Paragraph 2                       |
| Data items                         | 11 | List and define all variables for which data were sought (e.g., PICOS, funding sources) and any assumptions and simplifications made.                                                                                                                                                                       | Page 7 Paragraph 2                       |
| Risk of bias in individual studies | 12 | Describe methods used for assessing risk of bias of individual studies (including specification of whether this was done at the study or outcome level), and how this information is to be used in any data synthesis.                                                                                      | N/A                                      |
| Summary measures                   | 13 | State the principal summary measures (e.g., risk ratio, difference in means).                                                                                                                                                                                                                               | Page 6 Paragraph 2<br>The change of rate |

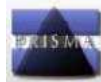

## PRISMA 2009 Checklist

Page 1 of 2

|                      |    |                                                                                                                                                           |                    |
|----------------------|----|-----------------------------------------------------------------------------------------------------------------------------------------------------------|--------------------|
| Synthesis of results | 14 | Describe the methods of handling data and combining results of studies, if done, including measures of consistency (e.g., $I^2$ ) for each meta-analysis. | Page 6 Paragraph 3 |
|----------------------|----|-----------------------------------------------------------------------------------------------------------------------------------------------------------|--------------------|

| Section/topic                 | #  | Checklist item                                                                                                                                                                                           | Reported on page #                                    |
|-------------------------------|----|----------------------------------------------------------------------------------------------------------------------------------------------------------------------------------------------------------|-------------------------------------------------------|
| Risk of bias across studies   | 15 | Specify any assessment of risk of bias that may affect the cumulative evidence (e.g., publication bias, selective reporting within studies).                                                             | Page 6 Paragraph 3                                    |
| Additional analyses           | 16 | Describe methods of additional analyses (e.g., sensitivity or subgroup analyses, meta-regression), if done, indicating which were pre-specified.                                                         | N/A                                                   |
| <b>RESULTS</b>                |    |                                                                                                                                                                                                          |                                                       |
| Study selection               | 17 | Give numbers of studies screened, assessed for eligibility, and included in the review, with reasons for exclusions at each stage, ideally with a flow diagram.                                          | Page 7 Paragraph 1 and Figure 1                       |
| Study characteristics         | 18 | For each study, present characteristics for which data were extracted (e.g., study size, PICOS, follow-up period) and provide the citations.                                                             | Page 7 Paragraph 2                                    |
| Risk of bias within studies   | 19 | Present data on risk of bias of each study and, if available, any outcome level assessment (see item 12).                                                                                                | N/A                                                   |
| Results of individual studies | 20 | For all outcomes considered (benefits or harms), present, for each study: (a) simple summary data for each intervention group (b) effect estimates and confidence intervals, ideally with a forest plot. | Page 7 Paragraph 3, Page 8 Paragraph 2-4 and Figure 2 |
| Synthesis of results          | 21 | Present results of each meta-analysis done, including confidence intervals and measures of consistency.                                                                                                  | Figure 2                                              |
| Risk of bias across studies   | 22 | Present results of any assessment of risk of bias across studies (see Item 15).                                                                                                                          | Figure 2                                              |
| Additional analysis           | 23 | Give results of additional analyses, if done (e.g., sensitivity or subgroup analyses, meta-regression [see Item 16]).                                                                                    | N/A                                                   |
| <b>DISCUSSION</b>             |    |                                                                                                                                                                                                          |                                                       |
| Summary of evidence           | 24 | Summarize the main findings including the strength of evidence for each main outcome; consider their relevance to key groups (e.g., healthcare providers, users, and policy makers).                     | Page 9 Paragraph 1                                    |
| Limitations                   | 25 | Discuss limitations at study and outcome level (e.g., risk of bias), and at review-level (e.g., incomplete retrieval of identified research, reporting bias).                                            | Page 10 Paragraph 1                                   |
| Conclusions                   | 26 | Provide a general interpretation of the results in the context of other evidence, and implications for future research.                                                                                  | Page 10 Paragraph 2                                   |
| <b>FUNDING</b>                |    |                                                                                                                                                                                                          |                                                       |
| Funding                       | 27 | Describe sources of funding for the systematic review and other support (e.g., supply of data); role of funders for the systematic review.                                                               | Page 11 Funding                                       |

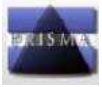

# PRISMA 2009 Checklist

1  
2  
3  
4  
5  
6  
7  
8  
9  
10  
11  
12  
13  
14  
15  
16  
17  
18  
19  
20  
21  
22  
23  
24  
25  
26  
27  
28  
29  
30  
31  
32  
33  
34  
35  
36  
37  
38  
39  
40  
41  
42  
43  
44  
45  
46  
47  
48  
49

From: Moher D, Liberati A, Tetzlaff J, Altman DG, The PRISMA Group (2009). Preferred Reporting Items for Systematic Reviews and Meta-Analyses: The PRISMA Statement. PLoS Med 6(6): e1000097. doi:10.1371/journal.pmed1000097

For more information, visit: [www.prisma-statement.org](http://www.prisma-statement.org).

For peer review only
